# Supplementary material
Source: PubMed Central journal article supplement (PMC9170029)
Supplement: NIHMS1798333-supplement-Supplementary_Information.pdf [file NIHMS1798333-supplement-Supplementary_Information.pdf]

a

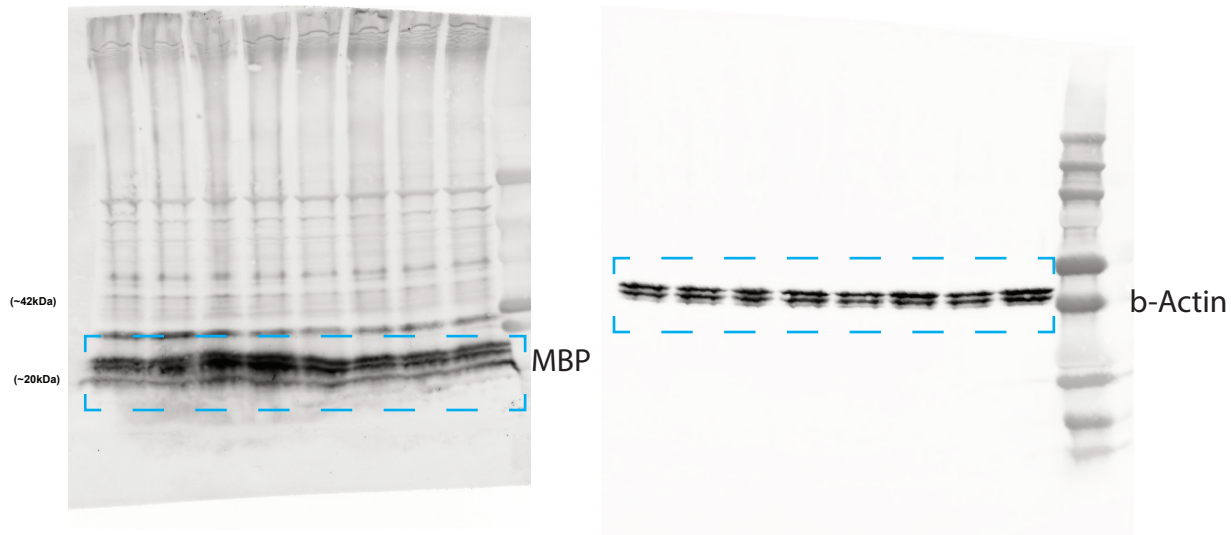

b

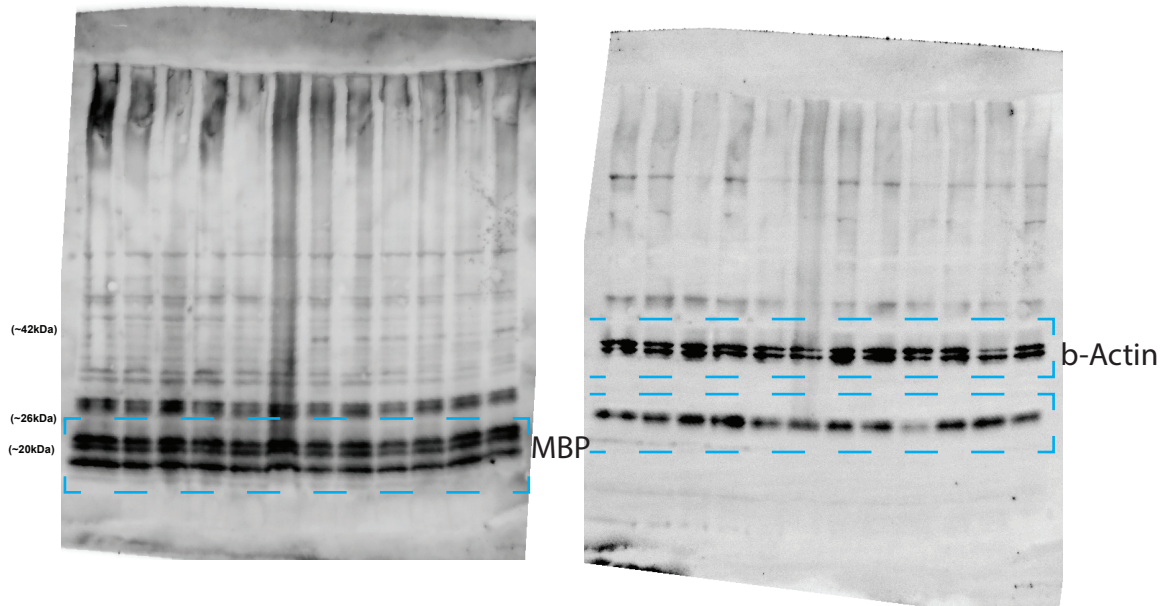

c

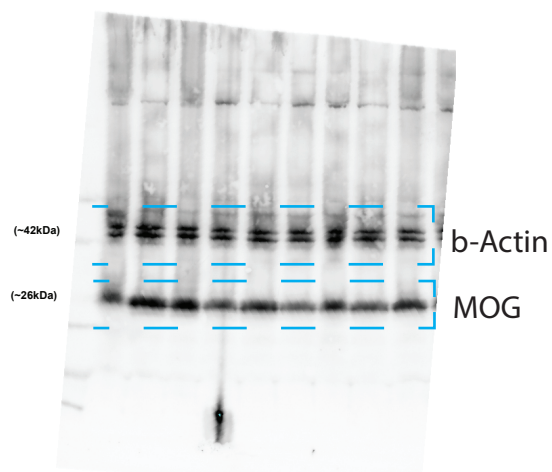

d

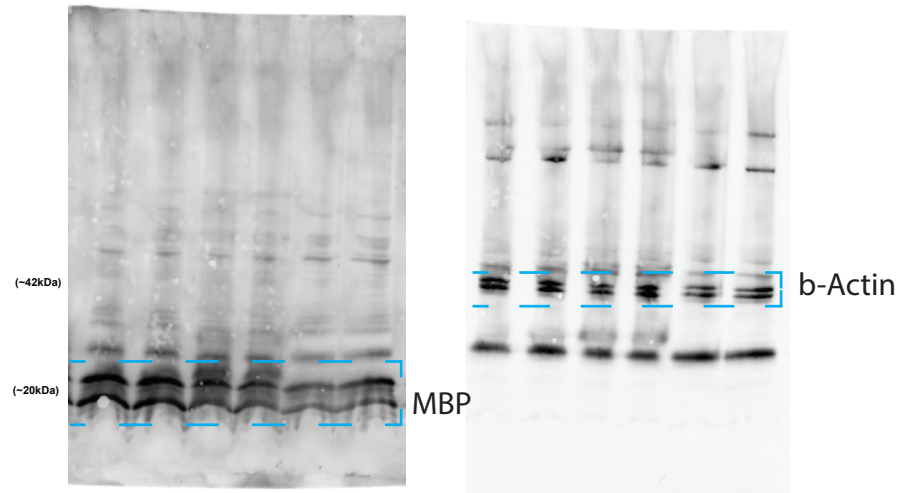

**Supplementary Data Figure 1. Raw scans of western blots in the paper.**

a, Blot scans corresponding to Extended Data Figure 6h. b, Blot scans corresponding to Extended Data Figure 6 b,c. c, Blot scans corresponding to Extended Data Figure 6j (left). d, Blot scans corresponding to Extended Data Figure 6j (right).

a

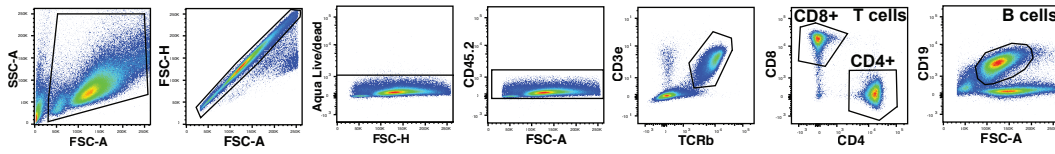

b

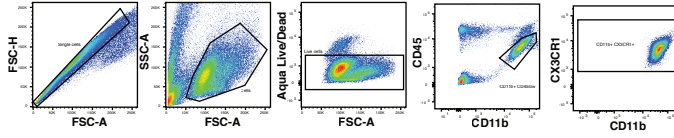

c

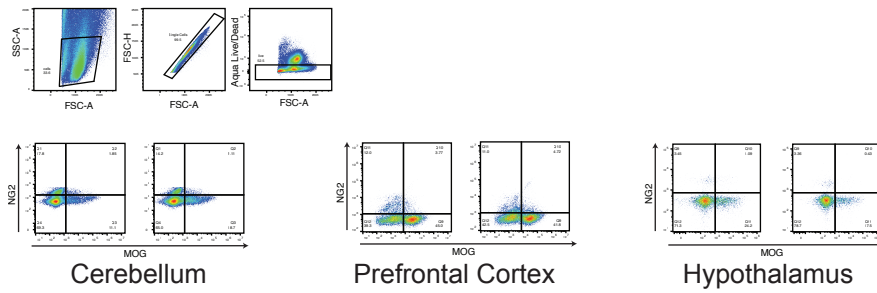

**Supplementary Data Figure 2. Glow cytometry gating strategies used in the paper.**  
 a, Gating for Figure 3g,h and Extended Data Figure 3c,d. b, Gating strategy for Extended Data Figure 3f. c, Gating strategy for Extended Data Figure 6a.

Supplementary Data Table1. Strains used in this study

| Name  | Strain                                  | Specific Genotype  | plasmid          | source     |
|-------|-----------------------------------------|--------------------|------------------|------------|
|       | <i>B. ovatus</i> ATCC 8483 $\Delta tdk$ |                    |                  | lab stock  |
|       | <i>Lactobacillus plantarum</i> BAA-793  |                    |                  | ATCC       |
|       | <i>E. coli</i> S17-1 $\lambda$ pir      |                    |                  | lab stock  |
| MFA01 | <i>B. ovatus</i> ATCC 8483 $\Delta tdk$ | $\Delta BO\_01194$ |                  | this study |
| MFA02 | <i>B. ovatus</i> ATCC 8483 $\Delta tdk$ |                    | pMFA01           | this study |
| MFA03 | <i>B. ovatus</i> ATCC 8483 $\Delta tdk$ |                    | pMFA02           | this study |
| MFA04 | <i>B. ovatus</i> ATCC 8483 $\Delta tdk$ |                    | pMFA01 and pMF03 | this study |
| MFA05 | <i>B. ovatus</i> ATCC 8483 $\Delta tdk$ |                    | pMFA04           | this study |

Supplementary Data Table 2. Plasmids used in this study

| plasmids                | back bone       | promoter       | introduced gene                    | source     |
|-------------------------|-----------------|----------------|------------------------------------|------------|
| pExchange_tdk_ΔBO_01194 | pEchange_tdk    |                | up and down stream of BACOVA_01194 | this study |
| pMFA01                  | pNBU2_bla_ermGb | phage promoter | BACOVA_01194                       | this study |
| pMFA02                  | pNBU2_bla_ermGb | phage promoter | bsPAD                              | this study |
| pMFA03                  | pNBU2_bla_tetQb | phage promoter | bsPAD                              | this study |
| pMFA04                  | pNBU2_bla_tetQb | phage promoter | BACOVA_01194. bsPAD                | this study |

Supplementary Data Table 3. primers used in this study for generation of engineered bacterial strains

| primer #                                     | primer name         | sequence (5'-3')                                       |               |
|----------------------------------------------|---------------------|--------------------------------------------------------|---------------|
| Upstream of BACOVA_01194                     |                     |                                                        |               |
| 1                                            | BO_01194_US_F       | GCGGGATCCAAAGATGTTATTCACCTTACC                         | <i>Bam</i> HI |
| 2                                            | BO_01194_US_R       | GCGGTCGACTTTCTGTACTAGATATTTTATG                        | <i>Sal</i> I  |
| Downstream of BACOVA_01194                   |                     |                                                        |               |
| 3                                            | BO_01194_DS_F       | GCGGTCGACAATGAAATATGCATTAGTAACC                        | <i>Sal</i> I  |
| 4                                            | BO_01194_DS_R       | GCGCTGCAGACTGCGTTAATAACAGGAGC                          | <i>Pst</i> I  |
| pNBU2 vector for gibson assembly             |                     |                                                        |               |
| 5                                            | pNBU2_F             | TCTAGAACTAGTGGATCCCC                                   |               |
| 6                                            | pNBU2_R             | GCGGCCGCCACCGCGG                                       |               |
| phage promoter BO_01194                      |                     |                                                        |               |
| 7                                            | 3'pNBU2_phageP_F    | CCTCCACCGCGGTGGCGGCCGCGATAAAAACGAAAGGCTCAG             |               |
| 8                                            | phageP_5'BO_01194_R | GTCAGCTATCATCTACTTTGTTTCTTTTCGACAC                     |               |
| 9                                            | 3'phageP_BO_01194_F | GAAAGAAACAAAGTAGATGATAGCTGACAAAAGTATAA                 |               |
| 10                                           | 5'pNBU2_BO_01194_R  | CGGGGGATCCACTAGTTCTAGATTATTTATCTTCTTTTTTGAG            |               |
| phage promoter bsPAD                         |                     |                                                        |               |
| 7                                            | 3'pNBU2_phageP_F    | CCT CCA CCG CGG TGG CGG CCG CGA TAA AAC GAA AGG CTC AG |               |
| 11                                           | phageP_5'bsPAD_R    | ACTGTA CTTCATCTACTTTGTTTCTTTTCGACAC                    |               |
| 12                                           | 3'phageP_bsPAD_F    | GAAACAAAGTAGATGAAGTACAGTAAAAGACTAAG                    |               |
| 13                                           | 5'pNBU2_bsPAD_R     | CGGGGGATCCACTAGTTCTAGATTATAATCTTCCCCGCGG               |               |
| phage promoter BO_01194 phage promoter bsPAD |                     |                                                        |               |
| 7                                            | 3'pNBU2_phageP_F    | CCTCCACCGCGGTGGCGGCCGCGATAAAAACGAAAGGCTCAG             |               |
| 14                                           | 5'phageP_BO_01194_R | TCTCAAAAAAGAAGATAAATAAGATAAAAACGAAAGGCTCAG             |               |
| 12                                           | 3'phageP_bsPAD_F    | GAAACAAAGTAGATGAAGTACAGTAAAAGACTAAG                    |               |
| 13                                           | 5'pNBU2_bsPAD_R     | CGGGGGATCCACTAGTTCTAGATTATAATCTTCCCCGCGG               |               |

Supplementary Data Table 4. Region of Interest (ROI) Definitions corresponding to Fig. 2a-b, ED Fig. 4a-b

| Bregma - 0.9 mm |            |                                                       | Bregma - 1.6 mm |            |                                                      | Bregma - 2 mm |             |                                                       |
|-----------------|------------|-------------------------------------------------------|-----------------|------------|------------------------------------------------------|---------------|-------------|-------------------------------------------------------|
| ROIs number     | ROIs label | ROIs full name                                        | ROIs number     | ROIs label | ROIs full name                                       | ROIs number   | ROIs label  | ROIs full name                                        |
| 1               | L - S2     | Left secondary somatosensory cortex                   | 1               | L - Pir    | Left piriform cortex                                 | 1             | L - AuV     | Left secondary auditory cortex, ventral area          |
| 2               | L - SIULp  | Left primary somatosensory cortex, upper lip region   | 2               | L - PRh    | Left perirhinal cortex                               | 2             | L - AuD     | Left secondary auditory cortex, dorsal area           |
| 3               | L - SIBf   | Left primary somatosensory cortex, barrel field       | 3               | L - Et     | Left entorhinal cortex                               | 3             | L - SI      | Left primary somatosensory cortex                     |
| 4               | L - S1Sh   | Left primary somatosensory cortex, shoulder region    | 4               | L - S2     | Left secondary somatosensory cortex                  | 4             | L - SIBf    | Left primary somatosensory cortex, barrel field       |
| 5               | L - SIHL   | Left primary somatosensory cortex, hindlimb region    | 5               | L - SIULp  | Left primary somatosensory cortex, upper lip region  | 5             | L - Pt      | Left parietal cortex, posterior area                  |
| 6               | L - MI-M2  | Left primary and secondary motor cortex               | 6               | L - S1BF   | Left primary somatosensory cortex, barrel field      | 6             | L - LPTa    | Left lateral parietal association cortex              |
| 7               | L - RSD    | Left retrosplenial dysgranular cortex                 | 7               | L - S1Tr   | Left primary somatosensory cortex, trunk region      | 7             | L - MPA     | Left medial parietal association cortex               |
| 8               | L - RSG    | Left retrosplenial granular cortex                    | 8               | L - PTA    | Left parietal association cortex                     | 8             | L - RSD     | Left retrosplenial dysgranular cortex                 |
| 9               | L - CA     | Left hippocampus                                      | 9               | L - RS     | Left retrosplenial cortex                            | 9             | L - RSG     | Left retrosplenial granular cortex                    |
| 10              | L - LV     | Left lateral ventricle                                | 10              | R - RS     | Right retrosplenial cortex                           | 10            | L - CA      | Left hippocampus                                      |
| 11              | L - Cpu    | Left caudate putamen (striatum)                       | 11              | R - PTA    | Right parietal association cortex                    | 11            | L - fi - ic | Left fimbria of the hippocampus and internal capsule  |
| 12              | L - Ri     | Left reticular nucleus                                | 12              | R - S1Tr   | Right primary somatosensory cortex, trunk region     | 12            | L - DLG     | Left dorsal lateral geniculate nucleus                |
| 13              | L - LD     | Left laterodorsal and anteroventral thalamic nucleus  | 13              | R - S1BF   | Right primary somatosensory cortex, barrel field     | 13            | L - LP      | Left lateral posterior thalamic nucleus               |
| 14              | L - VL     | Left ventrolateral thalamic nucleus                   | 14              | R - SIULp  | Right primary somatosensory cortex, upper lip region | 14            | L - Hb      | Left habenular nucleus                                |
| 15              | L - AM     | Left anteromedial thalamic nucleus                    | 15              | R - S2     | Right secondary somatosensory cortex                 | 15            | L - VP      | Left ventral thalamic nucleus                         |
| 16              | R - AM     | Right anteromedial thalamic nucleus                   | 16              | R - Et     | Right entorhinal cortex                              | 16            | L - MDD     | Left mediodorsal thalamic nucleus                     |
| 17              | R - VL     | Right ventrolateral thalamic nucleus                  | 17              | R - PRh    | Right perirhinal cortex                              | 17            | R - MDD     | Right mediodorsal thalamic nucleus                    |
| 18              | R - LD     | Right laterodorsal and anteroventral thalamic nucleus | 18              | R - Pir    | Right piriform cortex                                | 18            | R - VP      | Right ventral thalamic nucleus                        |
| 19              | R - Ri     | Right reticular nucleus                               | 19              | L - cc     | Left corpus callosum                                 | 19            | R - Hb      | Right habenular nucleus                               |
| 20              | R - Cpu    | Right caudate putamen (striatum)                      | 20              | R - cc     | Right corpus callosum                                | 20            | R - LP      | Right lateral posterior thalamic nucleus              |
| 21              | R - LV     | Right lateral ventricle                               | 21              | L - CA     | Left hippocampus                                     | 21            | R - DLG     | Right dorsal lateral geniculate nucleus               |
| 22              | R - CA     | Right hippocampus                                     | 22              | R - CA     | Right hippocampus                                    | 22            | R - fi - ic | Right fimbria of the hippocampus and internal capsule |
| 23              | R - RSD    | Right retrosplenial granular cortex                   | 23              | L - Hb     | Left habenular nucleus                               | 23            | R - CA      | Right hippocampus                                     |
| 24              | R - RSG    | Right retrosplenial dysgranular cortex                | 24              | R - Hb     | Right habenular nucleus                              | 24            | R - RSG     | Right retrosplenial granular cortex                   |
| 25              | R - MI-M2  | Right primary and secondary motor cortex              | 25              | L - LD     | Left laterodorsal thalamic nucleus                   | 25            | R - RSD     | Right retrosplenial dysgranular cortex                |
| 26              | R - SIHL   | Right primary somatosensory cortex, hindlimb region   | 26              | R - LD     | Right laterodorsal thalamic nucleus                  | 26            | R - MPA     | Right medial parietal association cortex              |
| 27              | R - S1Sh   | Right primary somatosensory cortex, shoulder region   | 27              | L - Cpu    | Left caudate putamen (striatum)                      | 27            | R - LPTa    | Right lateral parietal association cortex             |
| 28              | R - SIBf   | Right primary somatosensory cortex, barrel field      | 28              | L - ic     | Left internal capsule                                | 28            | R - Pt      | Right parietal cortex, posterior area                 |
| 29              | R - SIULp  | Right primary somatosensory cortex, upper lip region  | 29              | L - VL     | Left ventral thalamic nucleus                        | 29            | R - S1BF    | Right primary somatosensory cortex, barrel field      |
| 30              | R - S2     | Right secondary somatosensory cortex                  | 30              | L - Me     | Left medial amygdaloid nucleus                       | 30            | R - SI      | Right primary somatosensory cortex                    |
| 31              | L - Pir    | Left piriform cortex                                  | 31              | L - VM     | Left ventromedial thalamic nucleus                   | 31            | R - AuD     | Right secondary auditory cortex, dorsal area          |
| 32              | R - Pir    | Right piriform cortex                                 | 32              | L - MD     | Left mediodorsal thalamic nucleus                    | 32            | R - AuV     | Right secondary auditory cortex, ventral area         |
| 33              | L - AIP    | Left agranular insular cortex, posterior part         | 33              | R - Cpu    | Right caudate putamen (striatum)                     | 33            | L - Pir     | Left piriform cortex                                  |
| 34              | R - AIP    | Right agranular insular cortex, posterior part        | 34              | R - ic     | Right internal capsule                               | 34            | R - Pir     | Right piriform cortex                                 |
| 35              | L - GI     | Left gigantocellular reticular nucleus                | 35              | R - VL     | Right ventral thalamic nucleus                       | 35            | L - Ent     | Left entorhinal cortex                                |
| 36              | R - GI     | Right gigantocellular reticular nucleus               | 36              | R - Me     | Right medial amygdaloid nucleus                      | 36            | R - Ent     | Right entorhinal cortex                               |
| 37              | L - ic-GP  | Left internal capsule and globus pallidus             | 37              | R - VM     | Right ventromedial thalamic nucleus                  | 37            | L - Cpu     | Left caudate putamen (striatum)                       |
| 38              | R - ic-GP  | Right internal capsule and globus pallidus            | 38              | R - MD     | Right mediodorsal thalamic nucleus                   | 38            | R - Cpu     | Right caudate putamen (striatum)                      |
| 39              | L - Ce     | Left central amygdaloid nucleus                       | 39              | L - DM     | Left dorsomedial hypothalamic nucleus                | 39            | L - BL      | Left basolateral amygdaloid nucleus                   |
| 40              | R - Ce     | Right central amygdaloid nucleus                      | 40              | L - VMHC   | Left ventromedial hypothalamic nucleus               | 40            | R - BL      | Right basolateral amygdaloid nucleus                  |
| 41              | L - AA     | Left anterior amygdaloid area                         | 41              | R - DM     | Right dorsomedial hypothalamic nucleus               | 41            | L - Co      | Left cortical amygdaloid area                         |
| 42              | R - AA     | Right anterior amygdaloid area                        | 42              | R - VMH    | Right ventromedial hypothalamic nucleus              | 42            | R - Co      | Right cortical amygdaloid area                        |
| 43              | L - PLH    | Left peduncular part of lateral hypothalamus          |                 |            |                                                      | 43            | L - STh     | Left subthalamic nucleus                              |
| 44              | R - PLH    | Right peduncular part of lateral hypothalamus         |                 |            |                                                      | 44            | R - STh     | Right subthalamic nucleus                             |
| 45              | L - AH     | Left anterior hypothalamic area,                      |                 |            |                                                      | 45            | L - VM      | Left ventromedial thalamic nucleus                    |
| 46              | R - AH     | Right anterior hypothalamic area,                     |                 |            |                                                      | 46            | R - VM      | Right ventromedial thalamic nucleus                   |
| 47              | L - RCh    | Left - retrochiasmatic area                           |                 |            |                                                      | 47            | L - PH      | Left posterior hypothalamic nucleus                   |
| 48              | R - RCh    | Right - retrochiasmatic area                          |                 |            |                                                      | 48            | R - PH      | Right posterior hypothalamic nucleus                  |
| 49              | L - Pa     | Left - hypothalamic nucleus                           |                 |            |                                                      | 49            | L - VMH     | Left ventromedial hypothalamic nucleus                |
| 50              | R - Pa     | Right - hypothalamic nucleus                          |                 |            |                                                      | 50            | R - VMH     | Right ventromedial hypothalamic nucleus               |
|                 |            |                                                       |                 |            |                                                      | 51            | L - PLH     | Left - lateral hypothalamus                           |
|                 |            |                                                       |                 |            |                                                      | 52            | R - PLH     | Right - lateral hypothalamus                          |

Supplementary Data Table 5. Primers used in this study for qPCR

| primer name    | sequence (5'-3')         |
|----------------|--------------------------|
| <i>Sult1A1</i> |                          |
| sult1a1for     | CCCGGATACCTTCCTTGAG      |
| sult1a1rev     | CCATAGGACACTTTCCCATCCA   |
| <i>B-actin</i> |                          |
| bactinfor      | AGAGGGAAATCGTGCGTGAC     |
| bactinrev      | CAATAGTGATGACCTGGCCGT    |
| <i>Mog</i>     |                          |
| mogfor         | CGGACAGAGCTGCTGAAAGA     |
| mogrev         | TGCTCGAAGTTTTCTCTCAGT    |
| <i>Mbp</i>     |                          |
| mbpfor         | CGGACAGAGCTGCTGAAAGA     |
| mbprev         | TGCTCGAAGTTTTCTCTCAGT    |
| <i>Cspg4</i>   |                          |
| cspg4for       | CCTTCACTGTCACTGTCCTGC    |
| cspg4rev       | CAGGGTTCCTCTGTGTGAGAACA  |
| <i>Cd11b</i>   |                          |
| cd11bfor       | AAGCTCTTCTGGTCACAGCC     |
| cd11brev       | GCAACAACCACACTGGTTCC     |
| <i>Tmem119</i> |                          |
| tmem119for     | TCACCCAGAGCTGGTTCCAT     |
| tmem119rev     | GTGACACAGAGTAGGCCACC     |
| <i>Csf11r</i>  |                          |
| tmem119for     | GGTTGTAGAGCCGGGTGAAA     |
| tmem119rev     | AAGAGTGGGCCGGATCTTTG     |
| <i>Sfpil</i>   |                          |
| sfpilfor       | CCCAAGGGGACTATCTCCA      |
| sfpilrev       | TGTCGAGCCTGAGAGGGG       |
| <i>Mafb</i>    |                          |
| mafbfor        | TTGGCTAAGAAGAGGGCAGC     |
| mafbrev        | TTCCTTAGCTCAGCCTTGCC     |
| <i>Cd14</i>    |                          |
| cd14for        | ACTGAAGCCTTTCTCGGAGC     |
| cd14rev        | AAGCACACGCTCCATGGTC      |
| <i>Il10</i>    |                          |
| il10for        | CAGAGAAGCATGGCCCAGAA     |
| il10rev        | GACACCTTGGTCTTGGAGCTTA   |
| <i>Tgfb</i>    |                          |
| tgfbfor        | GCTGAACCAAGGAGACGGAA     |
| tgfbrev        | ATGTCATGGATGGTGCCAG      |
| <i>Tnfa</i>    |                          |
| tnfafor        | CCCTCACACTCAGATCATCTTCT  |
| tnfarev        | GCTACGACGTGGGCTACAG      |
| <i>Cd68</i>    |                          |
| cd68for        | TTACCTTTGGATTCAAACAGGACC |
| cd68rev        | GAGGCAGCAAGAGGGACTG      |

## Supplementary QuantSeq Data of the PVT. Corresponding to Fig. 3c.

| Ensembl ID            | diff       | lwr        | upr        | p.adj      | external_gene |
|-----------------------|------------|------------|------------|------------|---------------|
| ENSMUSG00000062393.13 | -9.1902232 | -10.969512 | -7.410934  | 4.12E-08   | Dgkk          |
| ENSMUSG0000007590.2   | 1.63400261 | 0.93075942 | 2.3372458  | 0.00011493 | Nrbp2         |
| ENSMUSG00000021258.9  | 1.3799642  | 0.69122751 | 2.0687009  | 0.0004224  | Ccnk          |
| ENSMUSG00000102990.1  | -7.14378   | -9.12013   | -5.1674301 | 1.63E-06   | Gm37764       |
| ENSMUSG00000034839.5  | 0.98142587 | 0.05294042 | 1.90991132 | 0.03755739 | Larp6         |
| ENSMUSG00000098905.1  | -9.1702681 | -11.220953 | -7.119583  | 1.82E-07   | Zfp953        |
| ENSMUSG00000010538.14 | -7.3013634 | -9.2859287 | -5.3167981 | 1.36E-06   | Tsacc         |
| ENSMUSG00000028082.13 | -1.9440313 | -2.8989155 | -0.9891471 | 0.00036849 | Sh3d19        |
| ENSMUSG00000038121.6  | -0.863599  | -1.605057  | -0.1221409 | 0.02182864 | Fam210a       |
| ENSMUSG00000037376.14 | -1.5261407 | -2.2828448 | -0.7694366 | 0.00039938 | Trmt6         |
| ENSMUSG00000021520.4  | 2.6000043  | 1.49194416 | 3.70806443 | 0.00010515 | Uqcrc         |
| ENSMUSG00000024413.13 | 2.06122033 | 1.18228419 | 2.94015648 | 0.00010569 | Npct1         |
| ENSMUSG00000031701.6  | -1.1808137 | -1.7091713 | -0.6524561 | 0.00016297 | Dnaja2        |
| ENSMUSG00000106691.1  | -6.1956007 | -8.5643589 | -3.8268426 | 3.86E-05   | 2700029L08F   |
| ENSMUSG00000108194.1  | -8.0423081 | -10.346274 | -5.738342  | 2.32E-06   | 1700097M23    |
| ENSMUSG00000035011.15 | -0.3037901 | -0.5751115 | -0.0324687 | 0.02739306 | Zbtb7a        |
| ENSMUSG00000056708.5  | 1.40608956 | 0.56247357 | 2.24970555 | 0.00188881 | Ier5          |
| ENSMUSG00000105270.1  | -6.907755  | -9.3523359 | -4.463174  | 1.85E-05   | Gm42863       |
| ENSMUSG00000025959.13 | 1.08621855 | 0.24506883 | 1.92736827 | 0.01156818 | Klf7          |
| ENSMUSG00000019689.4  | 2.43579701 | 1.2954561  | 3.57613791 | 0.00024304 | Fmc1          |
| ENSMUSG00000097479.1  | -0.904214  | -1.4501729 | -0.3582552 | 0.00198365 | Gm26582       |
| ENSMUSG00000019777.16 | -0.9701305 | -1.6953137 | -0.2449474 | 0.00918467 | Hdac2         |
| ENSMUSG00000024735.13 | -0.51007   | -0.7849737 | -0.2351664 | 0.00080311 | Prpf19        |
| ENSMUSG00000026109.14 | -2.3771148 | -3.3916768 | -1.3625528 | 0.00010657 | Tmeff2        |
| ENSMUSG00000064247.14 | -1.6550233 | -2.6500542 | -0.6599924 | 0.00191932 | Plcxd1        |
| ENSMUSG00000074909.4  | -0.8997635 | -1.7578112 | -0.0417158 | 0.03917823 | Ranbp6        |
| ENSMUSG00000021065.15 | -7.0165049 | -9.5137284 | -4.5192813 | 1.95E-05   | Fut8          |
| ENSMUSG00000078591.1  | -2.0040411 | -3.0832651 | -0.9248171 | 0.00079788 | Hs3st4        |
| ENSMUSG00000106702.1  | 2.43002927 | 1.22086407 | 3.63919447 | 0.00041167 | Gm42846       |
| ENSMUSG00000032251.12 | -1.5842992 | -2.5476405 | -0.620958  | 0.00209383 | Irak1bp1      |
| ENSMUSG00000038740.9  | 2.05266381 | 0.88453883 | 3.22078879 | 0.00124703 | Mvbi2b        |
| ENSMUSG00000031703.8  | -1.1726677 | -2.1194498 | -0.2258857 | 0.01506018 | Irf1          |
| ENSMUSG00000021087.17 | -0.2898531 | -0.5629019 | -0.0168042 | 0.03671203 | Rtn1          |
| ENSMUSG00000082127.2  | 0.87639733 | 0.08573507 | 1.66705959 | 0.02898888 | Gm13577       |
| ENSMUSG00000109362.1  | -6.8194269 | -9.3129317 | -4.3259221 | 2.53E-05   | Gm44562       |
| ENSMUSG00000038000.10 | 1.63245385 | 0.59421235 | 2.67069535 | 0.00294131 | Acad          |
| ENSMUSG00000027133.3  | 1.18736361 | 0.29544802 | 2.0792792  | 0.00948643 | Nop10         |
| ENSMUSG00000069495.12 | -1.6866894 | -2.7384864 | -0.6348925 | 0.00253692 | Epc2          |
| ENSMUSG00000018770.9  | 1.5545885  | 0.47381237 | 2.63536463 | 0.00560088 | Atpsg3        |
| ENSMUSG00000073684.13 | 1.27406792 | 0.26526882 | 2.28286702 | 0.01333017 | Faap20        |
| ENSMUSG00000047843.16 | 0.76378327 | 0.16498747 | 1.36257908 | 0.01251814 | Bri3          |
| ENSMUSG00000020664.9  | -1.2781038 | -2.2816511 | -0.2745565 | 0.01264041 | Dld           |
| ENSMUSG00000058318.15 | 0.62109581 | 0.10055817 | 1.14163346 | 0.01891645 | Phf21a        |
| ENSMUSG00000021413.8  | -0.4770054 | -0.8081903 | -0.1458205 | 0.00554929 | Prpf4b        |
| ENSMUSG00000043284.12 | 1.22733013 | 0.19272356 | 2.26193671 | 0.01958496 | Tmem11        |
| ENSMUSG00000024603.7  | -0.7234576 | -1.2321612 | -0.214754  | 0.00606288 | Dctn4         |
| ENSMUSG00000101671.1  | 1.32054426 | 0.38873335 | 2.25235517 | 0.00621228 | Gm28221       |
| ENSMUSG00000056050.12 | -1.1198894 | -2.0896536 | -0.1501252 | 0.02294762 | Mia3          |
| ENSMUSG00000105361.1  | 0.20033087 | 0.05117675 | 0.34948499 | 0.00894494 | AY036118      |
| ENSMUSG00000024780.6  | 2.22488998 | 0.90934307 | 3.54043689 | 0.00168654 | Cdc371        |
| ENSMUSG00000029088.16 | -1.5232445 | -2.4054615 | -0.6410274 | 0.00143363 | Kcnp4         |
| ENSMUSG00000030967.14 | -1.3976763 | -2.5082354 | -0.2871173 | 0.01362822 | Zranb1        |
| ENSMUSG00000070498.3  | -2.7311564 | -4.9843828 | -0.4779299 | 0.01719976 | Tmem132b      |
| ENSMUSG00000079614.3  | -3.0097908 | -5.0245886 | -0.994993  | 0.00428091 | Seh1l         |
| ENSMUSG00000022000.10 | -1.116854  | -2.1956185 | -0.0380896 | 0.04188803 | Zc3h13        |
| ENSMUSG00000057315.14 | -2.322423  | -4.5886033 | -0.0558812 | 0.04418888 | Arhgap24      |
| ENSMUSG00000027677.17 | -1.2646546 | -2.3737337 | -0.1555756 | 0.02469087 | Tctc14        |
| ENSMUSG00000047921.15 | -1.4458658 | -2.5321797 | -0.359552  | 0.00949903 | Trappc9       |
| ENSMUSG00000078440.9  | 0.47371824 | 0.06727746 | 0.88015902 | 0.02174114 | Dohh          |
| ENSMUSG00000033938.5  | -0.5515067 | -1.0076518 | -0.0953615 | 0.0174653  | Ndufb7        |
| ENSMUSG00000022437.6  | -0.7641956 | -1.1270779 | -0.4013133 | 0.00027512 | Samms50       |
| ENSMUSG00000022808.4  | -1.6361222 | -2.8998004 | -0.3724441 | 0.01137493 | Smx4          |
| ENSMUSG00000026782.15 | -0.8825214 | -1.3201427 | -0.4463601 | 0.00039127 | Abi2          |
| ENSMUSG00000097224.1  | 1.24201419 | 0.12466279 | 2.35936558 | 0.02853438 | Gm26716       |
| ENSMUSG00000029674.13 | -1.1670034 | -2.103195  | -0.2308118 | 0.01447128 | Limk1         |
| ENSMUSG00000072692.7  | 0.65889452 | 0.11915684 | 1.19863219 | 0.01646793 | Rpl37rt       |
| ENSMUSG00000062203.14 | -1.5759524 | -2.7055333 | -0.4463715 | 0.00692007 | Gspt1         |
| ENSMUSG00000027080.6  | -1.884819  | -3.1141276 | -0.6555105 | 0.00354312 | Medi19        |
| ENSMUSG00000039917.10 | -0.5151421 | -0.9157019 | -0.1145823 | 0.01187764 | Rhbdd2        |
| ENSMUSG00000058558.12 | 1.27059155 | 0.03619038 | 2.50499272 | 0.04316712 | Rpl5          |
| ENSMUSG00000019659.8  | 1.59066768 | 0.45833873 | 2.72299662 | 0.00660137 | Ccdc12        |
| ENSMUSG0000008301.11  | 1.15231423 | 0.64810716 | 1.65652131 | 0.00013342 | Phax          |
| ENSMUSG00000013089.15 | -1.1715616 | -2.1990353 | -0.1440878 | 0.02469579 | Etv5          |
| ENSMUSG00000054568.7  | -1.7139258 | -3.123607  | -0.3042445 | 0.01688174 | Usp17a        |
| ENSMUSG00000103849.1  | -5.8115998 | -8.6608619 | -2.9623376 | 0.00036263 | Gm37806       |
| ENSMUSG00000079557.10 | -2.2386144 | -3.3716934 | -1.1055354 | 0.00047585 | 2-Mar         |
| ENSMUSG00000034327.17 | -2.1362343 | -3.4020107 | -0.8704579 | 0.00171432 | Kctd9         |
| ENSMUSG00000013367.5  | -1.977456  | -3.2728858 | -0.6820262 | 0.00365942 | Iglon5        |
| ENSMUSG00000000346.8  | 3.20176679 | 1.68277835 | 4.72075523 | 0.00027294 | Dazap2        |
| ENSMUSG00000001472.17 | -0.4994186 | -0.8104459 | -0.1883912 | 0.00251221 | Tcf25         |
| ENSMUSG00000028648.13 | 1.21774181 | 0.14891384 | 2.28656979 | 0.02480938 | Ndufs5        |
| ENSMUSG00000069020.9  | -1.7420376 | -3.1241127 | -0.3599625 | 0.01349817 | Urm1          |
| ENSMUSG00000020476.14 | -0.9930912 | -1.5177857 | -0.4683967 | 0.00068166 | Dbnl          |
| ENSMUSG00000023236.7  | -0.6151814 | -1.2135927 | -0.0167701 | 0.04344836 | Scg5          |
| ENSMUSG00000019863.6  | -2.7508179 | -5.1761499 | -0.3254858 | 0.02545812 | Qrs1l         |
| ENSMUSG00000059923.13 | -0.3965078 | -0.7086544 | -0.0843613 | 0.01285208 | Grb2          |
| ENSMUSG00000041777.11 | -1.3921366 | -2.4841401 | -0.3001332 | 0.01256108 | Cir1          |
| ENSMUSG00000062328.7  | -0.6116795 | -0.85603   | -0.367329  | 5.81E-05   | Rpl17         |
| ENSMUSG00000010609.15 | 2.34604343 | 1.14832695 | 3.54375991 | 0.00051171 | Psen2         |
| ENSMUSG00000020738.16 | 2.30960092 | 1.02199664 | 3.5972052  | 0.00105758 | Sumo2         |
| ENSMUSG00000024824.6  | -1.8863771 | -3.1821697 | -0.5905846 | 0.00514699 | Rad9a         |
| ENSMUSG00000027710.14 | -2.3399038 | -3.6235413 | -1.0562664 | 0.00092817 | Acad9         |
| ENSMUSG00000034361.10 | -2.168863  | -3.4206428 | -0.9170833 | 0.00139478 | Cpne2         |
| ENSMUSG00000018042.17 | -0.689631  | -1.313388  | -0.0658741 | 0.02940471 | Cybsr3        |
| ENSMUSG00000030652.11 | -0.4608889 | -0.7391717 | -0.1826061 | 0.0019837  | Cog7          |
| ENSMUSG00000025428.15 | -1.2300108 | -2.0056478 | -0.4543737 | 0.00275943 | Atpsa1        |
| ENSMUSG00000035601.9  | -6.9890958 | -10.360111 | -3.6180805 | 0.00031501 | Trmt10b       |
| ENSMUSG00000015971.4  | 1.57621945 | 0.33884787 | 2.81259104 | 0.01255928 | Actr8         |
| ENSMUSG00000031157.10 | -1.3436948 | -2.3265316 | -0.360858  | 0.00794274 | Pqbp1         |
| ENSMUSG00000029438.9  | -1.6228044 | -2.9818071 | -0.2638017 | 0.01882791 | Bcl7a         |
| ENSMUSG00000045348.16 | -2.8035975 | -4.3013168 | -1.3058782 | 0.00074683 | Nypap1        |
| ENSMUSG00000020964.14 | -0.6057546 | -1.0806675 | -0.1308418 | 0.01251972 | Set1l         |
| ENSMUSG00000031109.16 | -2.178576  | -3.4532272 | -0.9039247 | 0.001553   | Enox2         |
| ENSMUSG00000029823.16 | -1.3942009 | -2.6410069 | -0.1473949 | 0.02759408 | Luc7l2        |



ENSMUSG00000052539.15 -1.2798442 -2.4848314 -0.074857 0.03660506 Magi3  
 ENSMUSG00000059479.7 -1.9459905 -3.1970828 -0.6948983 0.00318707 B3gnt8  
 ENSMUSG00000047067.7 -1.0653596 -2.1224002 -0.008319 0.04806846 Dusp28  
 ENSMUSG00000020238.14 -1.7995438 -3.0849001 -0.5141874 0.00675664 Ncln  
 ENSMUSG00000041986.15 1.68178222 0.58794555 2.77561889 0.00347149 Elmod1  
 ENSMUSG00000078681.10 0.50522016 0.08025928 0.93018103 0.01933185 Tm2d3  
 ENSMUSG0000009575.14 0.32536274 0.0424842 0.60824128 0.02348809 Cbx5  
 ENSMUSG00000027522.15 -2.0818749 -3.6547149 -0.509035 0.00985149 Stx16  
 ENSMUSG00000102474.1 -4.6490735 -7.5146642 -1.7834828 0.00232297 2610012C04f  
 ENSMUSG00000067148.15 -1.4988503 -2.7895224 -0.2081782 0.02220972 Polr1c  
 ENSMUSG00000039148.4 -1.6635861 -2.7612427 -0.5659294 0.00385587 Sart1  
 ENSMUSG00000032329.3 1.5779619 0.33296841 2.8229554 0.01303422 Hmg20a  
 ENSMUSG00000061313.8 -0.7167888 -1.4116589 -0.0219186 0.04268754 Dhdh2  
 ENSMUSG00000021221.15 -2.3315031 -4.6189367 -0.0440695 0.04540011 Dpf3  
 ENSMUSG00000004562.16 0.63203255 0.36688525 0.89717985 9.11E-05 Arhgef40  
 ENSMUSG00000059187.12 -3.0994984 -5.5936755 -0.6062213 0.01472318 Fam19a1  
 ENSMUSG00000040563.13 -1.6725569 -3.0543273 -0.2907866 0.01734415 Pllpr2  
 ENSMUSG00000037940.16 1.76109072 0.62875099 2.89343044 0.0031896 Inpp4b  
 ENSMUSG00000031781.14 -1.4599127 -2.7829379 -0.1368875 0.02972402 Ciapin1  
 ENSMUSG00000007670.9 -1.8429265 -3.157717 -0.5281359 0.00670206 Khsp9  
 ENSMUSG00000035776.14 -0.9674451 -1.5661578 -0.3687325 0.00239494 Cd99l2  
 ENSMUSG00000026749.11 -1.8834227 -3.2498353 -0.5170101 0.00751581 Nek6  
 ENSMUSG00000003402.13 -1.8537808 -3.1955319 -0.5120297 0.0073968 PrkcsH  
 ENSMUSG00000047417.17 -1.2217847 -2.4222152 -0.0213543 0.04573761 REXO1  
 ENSMUSG00000042303.16 -1.9706296 -3.4191416 -0.5221177 0.00821011 Sgsm3  
 ENSMUSG00000068856.3 -1.3715861 -2.2784415 -0.4647308 0.00391398 Sf3b4  
 ENSMUSG00000049881.13 -1.5317517 -2.4042095 -0.659294 0.00125586 2810025M15  
 ENSMUSG00000041341.9 -2.2035283 -3.5387248 -0.8683318 0.00203844 Atg2b  
 ENSMUSG00000071454.13 -1.7257965 -3.1918281 -0.2597649 0.02050146 Dtnb  
 ENSMUSG00000014551.8 0.73841782 0.30865276 1.16818288 0.00148996 Mrps25  
 ENSMUSG00000015942.9 -1.7567548 -3.0193261 -0.4941834 0.00704889 Gtf2ird2  
 ENSMUSG00000041096.13 -2.5581099 -4.0028387 -1.113381 0.00117348 Tspyl2  
 ENSMUSG00000062012.13 -1.5211639 -2.7807606 -0.2615671 0.01758859 Zfp13  
 ENSMUSG00000009647.13 2.61818686 0.98149032 4.2548834 0.00258455 Mcu  
 ENSMUSG00000024548.11 -1.7276527 -3.3062869 -0.1490184 0.03111388 Setbp1  
 ENSMUSG00000097910.2 -3.5324814 -6.2143899 -0.850573 0.01017412 5033428I22R  
 ENSMUSG00000019923.13 -1.1609674 -1.8350914 -0.4868434 0.00146293 Zwint  
 ENSMUSG00000085586.1 -3.0822559 -5.8190959 -0.3454159 0.02650465 Gm11613  
 ENSMUSG00000029815.12 -4.6335839 -7.4978192 -1.7693486 0.00237409 Malsu1  
 ENSMUSG00000021486.6 -1.7633968 -3.3280534 -0.1987402 0.02639683 Prelid1  
 ENSMUSG00000003444.8 -2.0561449 -3.3222193 -0.7900704 0.00230504 Med29  
 ENSMUSG00000031988.9 -1.7949522 -3.1153165 -0.4745879 0.00825133 Vps26b  
 ENSMUSG00000108956.1 -6.2207261 -9.5706727 -2.8707794 0.00079776 Gm45179  
 ENSMUSG00000027809.14 -2.8946936 -5.5462052 -0.243722 0.03150345 Etfhd  
 ENSMUSG0000009292.17 -1.51967 -2.9761525 -0.0631875 0.0402226 Trpm2  
 ENSMUSG0000000399.10 -1.7773061 -3.3138938 -0.2407184 0.02273454 Ndufa9  
 ENSMUSG00000021192.15 -7.0639365 -10.152894 -3.9749792 0.00013267 Golga5  
 ENSMUSG00000109506.1 -5.673983 -8.9736453 -2.3743207 0.0014806 Gm44724  
 ENSMUSG00000028207.18 -1.594806 -2.910647 -0.278965 0.01720875 Asph  
 ENSMUSG0000005575.16 -1.675046 -3.1046816 -0.2454105 0.02108019 Ube2m  
 ENSMUSG00000019189.13 1.89039344 0.17018394 3.61060294 0.03041092 Rnf145  
 ENSMUSG00000057554.13 -1.6846847 -2.97148 -0.3978894 0.01058386 Legals8  
 ENSMUSG00000029993.16 -2.4567598 -4.0823595 -0.8311602 0.00393603 Nfu1  
 ENSMUSG00000027562.12 -1.5316364 -2.6292314 -0.4340413 0.00691049 Car2  
 ENSMUSG00000026944.18 -1.1682487 -2.1074998 -0.2289977 0.01467087 Abca2  
 ENSMUSG00000046020.13 -1.6571998 -2.9425291 -0.3718704 0.01168589 Pofut1  
 ENSMUSG00000063065.13 1.80083169 0.07295061 3.52871277 0.04045857 Mapk3  
 ENSMUSG00000056367.14 1.0897358 0.6059413 1.57353031 0.00015195 Actr3b  
 ENSMUSG00000016477.17 -1.7270208 -3.0492522 -0.4047895 0.01074665 E2f3  
 ENSMUSG00000052031.7 -1.6155337 -3.0538517 -0.1772157 0.02690838 Tagap1  
 ENSMUSG00000024472.9 -1.8531682 -3.4111134 -0.295223 0.01927045 Dcp2  
 ENSMUSG00000015829.13 -1.4133995 -2.8131031 -0.0136959 0.04760965 Tmr  
 ENSMUSG00000105083.1 -6.662964 -10.161084 -3.1648442 0.00064675 Gm42699  
 ENSMUSG00000067722.3 -1.5941967 -2.8061582 -0.3822352 0.01026382 BC0003965  
 ENSMUSG0000004798.14 1.52995619 0.2388849 2.82102747 0.01970839 Utk2  
 ENSMUSG00000085127.1 -4.4636928 -7.8014846 -1.125901 0.00920535 4930444E06f  
 ENSMUSG00000066643.12 -1.7298573 -2.8093428 -0.6503718 0.00255062 Wdr35  
 ENSMUSG00000062906.12 -7.3238637 -10.910486 -3.7372411 0.00035913 Hdac10  
 ENSMUSG0000001774.7 -1.759578 -3.4102073 -0.1089487 0.0358969 Chordc1  
 ENSMUSG00000087352.1 -1.2212836 -2.3898599 -0.0527073 0.03987633 Gm12999  
 ENSMUSG00000068205.14 -1.3429054 -2.4796384 -0.2061725 0.02007429 MacroD2  
 ENSMUSG00000023456.14 -1.0589852 -1.7416983 -0.3762722 0.00325286 Tpi1  
 ENSMUSG0000009739.16 -1.6539799 -3.0541588 -0.2538009 0.02008537 Pou6f1  
 ENSMUSG00000025551.13 -4.9946737 -8.237933 -1.7514144 0.00343013 Fgf14  
 ENSMUSG00000037234.17 -0.595835 -0.9928047 -0.1988653 0.00413663 Hook3  
 ENSMUSG00000041921.16 -2.0081892 -3.6330112 -0.3833672 0.01526069 Metap1d  
 ENSMUSG00000063511.11 -1.1225286 -1.9655544 -0.2795029 0.00947251 Srrnp70  
 ENSMUSG00000028876.7 -1.423883 -2.6829486 -0.1648175 0.02588482 Epha10  
 ENSMUSG00000028788.14 0.35894445 0.12289018 0.59499872 0.00376408 Ptp4a2  
 ENSMUSG00000033569.17 -1.6714648 -3.0063087 -0.3366208 0.01406855 Adgrb3  
 ENSMUSG00000024019.17 -0.4430392 -0.817247 -0.0688314 0.01981673 Cmt1  
 ENSMUSG00000023030.16 -1.7388135 -3.271815 -0.205812 0.02545149 Slc11a2  
 ENSMUSG00000020124.9 -1.4506069 -2.6602594 -0.2409544 0.01835318 Usp15  
 ENSMUSG00000055240.16 -2.1176685 -3.5085975 -0.7267396 0.00373025 Zfp101  
 ENSMUSG00000034973.16 -1.6034281 -3.1656918 -0.0411644 0.04381519 Dopey1  
 ENSMUSG00000025251.15 -3.1118075 -4.9087195 -1.3148954 0.00140034 Tmem192  
 ENSMUSG00000023143.10 -1.9340851 -3.396411 -0.4717591 0.00990209 Nagpa  
 ENSMUSG00000023990.18 -1.3619006 -2.1472571 -0.5765441 0.0013853 Tfeb  
 ENSMUSG00000027692.16 -1.6298336 -2.9909173 -0.26875 0.01851445 Tnik  
 ENSMUSG00000026568.6 -1.2057147 -2.3186121 -0.0928173 0.0328861 Mpc2  
 ENSMUSG00000037890.13 -3.0904263 -5.9272963 -0.2535562 0.03191059 Wdr19  
 ENSMUSG00000021578.16 -1.3426648 -2.5884176 -0.096912 0.03382814 Ccdc127  
 ENSMUSG00000022884.14 1.25023105 0.00887143 2.49159067 0.04824296 E1f4a2  
 ENSMUSG00000033943.15 -1.4761889 -2.8496761 -0.1027017 0.03434645 Mga  
 ENSMUSG00000037826.5 -1.181642 -2.3596843 -0.0035996 0.04924124 Ppm1k  
 ENSMUSG00000091542.1 -7.8855312 -11.95569 -3.8153725 0.00056112 Gm17167  
 ENSMUSG00000020312.11 -4.106307 -7.0871718 -1.1254422 0.00754603 Shc2  
 ENSMUSG00000008140.17 -0.5234224 -0.9562118 -0.090633 0.01743406 Emc10  
 ENSMUSG00000024392.17 -1.9843111 -3.3398692 -0.628753 0.00494947 Bag6  
 ENSMUSG00000039860.19 -0.4346919 -0.8566582 -0.0127255 0.04298557 Srrm3  
 ENSMUSG00000046058.7 1.43788368 0.00707826 2.8686891 0.04877721 Eid2  
 ENSMUSG00000021133.4 -2.747043 -4.4926637 -1.0014224 0.00292252 Snapc1  
 ENSMUSG00000022339.8 -1.3389218 -2.5838885 -0.0939552 0.03422669 Ebag9  
 ENSMUSG00000040028.10 -3.1805271 -5.1121386 -1.2489157 0.0020746 Elav1  
 ENSMUSG00000026860.16 -1.6664459 -3.2382621 -0.0946296 0.03696018 Sh3glb2

|                        |            |            |            |            |             |
|------------------------|------------|------------|------------|------------|-------------|
| ENSMUSG00000064302.13  | -2.255917  | -3.748502  | -0.763332  | 0.00393373 | Clasp1      |
| ENSMUSG00000002524.15  | -0.9576352 | -1.6106042 | -0.3046661 | 0.00488385 | Puf60       |
| ENSMUSG00000028890.13  | -1.6671846 | -3.0469354 | -0.2874338 | 0.01753004 | Mtf1        |
| ENSMUSG00000019876.15  | -4.677482  | -8.0388751 | -1.316089  | 0.00704472 | Pkib        |
| ENSMUSG00000029670.12  | -1.5741212 | -3.1459882 | -0.0022542 | 0.04964248 | Ing3        |
| ENSMUSG00000063801.7   | -1.2161666 | -2.2912516 | -0.1410816 | 0.02584263 | Ap3s2       |
| ENSMUSG00000021468.7   | -1.5144073 | -2.8873555 | -0.1414591 | 0.02978886 | Sptlc1      |
| ENSMUSG00000009927.8   | 0.85668175 | 0.13681638 | 1.57654713 | 0.01921594 | Rps25       |
| ENSMUSG00000047592.17  | -5.1742663 | -8.2611696 | -2.0873631 | 0.00180781 | Nxpe5       |
| ENSMUSG00000006519.11  | -5.9548186 | -9.4666155 | -2.4430217 | 0.00165243 | Cyba        |
| ENSMUSG00000021647.6   | -5.7614446 | -9.0385179 | -2.4843712 | 0.00124207 | Cartpt      |
| ENSMUSG000000031168.14 | -1.4084718 | -2.7706427 | -0.0463008 | 0.04216625 | Ebp         |
| ENSMUSG00000005410.6   | -4.1805343 | -7.3399708 | -1.0210978 | 0.00987356 | Mcm5        |
| ENSMUSG000000043542.12 | -1.5007202 | -2.8752639 | -0.1261766 | 0.03152445 | Zc2hc1a     |
| ENSMUSG000000042203.7  | -1.772648  | -3.0366019 | -0.5086942 | 0.00667665 | Tbcl2d2b    |
| ENSMUSG000000029434.12 | -1.6836893 | -3.0789742 | -0.2884044 | 0.01767365 | Vps33a      |
| ENSMUSG000000057716.6  | -1.3650604 | -2.5843286 | -0.1457921 | 0.0274062  | Tmem178b    |
| ENSMUSG000000089824.10 | 1.80867494 | 0.52996257 | 3.0873873  | 0.00629583 | Rbm12       |
| ENSMUSG000000041229.15 | -3.8828248 | -6.8172601 | -0.9483894 | 0.0098734  | Phf8        |
| ENSMUSG000000028618.11 | 1.78341888 | 0.139858   | 3.42697976 | 0.03260683 | Tmem59      |
| ENSMUSG000000009995.17 | -2.1724677 | -3.8643941 | -0.4805413 | 0.01199885 | Taz         |
| ENSMUSG000000060038.14 | -2.4723895 | -4.2350544 | -0.7097245 | 0.00667075 | Dhps        |
| ENSMUSG00000028849.17  | -1.5719811 | -2.9324443 | -0.2207179 | 0.02198185 | Map7d1      |
| ENSMUSG000000062591.5  | -0.7238759 | -1.2241613 | -0.2235905 | 0.00537313 | Tubb4a      |
| ENSMUSG000000039849.5  | -1.6025861 | -3.135671  | -0.0716052 | 0.03954357 | Pcf1        |
| ENSMUSG000000050538.8  | -1.9682181 | -3.3532356 | -0.5832005 | 0.006095   | B230217C12  |
| ENSMUSG000000015291.10 | -1.88653   | -3.232175  | -0.540885  | 0.00669339 | Gd1         |
| ENSMUSG00000023032.12  | -1.7879039 | -3.2962477 | -0.2795602 | 0.01967728 | Slc4a8      |
| ENSMUSG000000020235.16 | -1.6267879 | -3.0528837 | -0.2006921 | 0.02463448 | Fzr1        |
| ENSMUSG000000075376.10 | -1.7310133 | -3.1317823 | -0.3302443 | 0.01527484 | Rc3h2       |
| ENSMUSG000000026307.12 | -5.4110897 | -8.8908657 | -1.9313138 | 0.00319349 | Scly        |
| ENSMUSG000000096257.2  | -6.4415177 | -9.9368893 | -2.9461461 | 0.00084914 | Ccer2       |
| ENSMUSG000000057858.7  | -2.3835227 | -4.1556875 | -0.611358  | 0.00886276 | Fam204a     |
| ENSMUSG000000098183.1  | 1.00194263 | 0.00530555 | 1.9985797  | 0.04868537 | Gm27010     |
| ENSMUSG000000034109.15 | -2.1644258 | -3.7173523 | -0.6114992 | 0.00696758 | Golim4      |
| ENSMUSG000000027895.9  | -2.0579452 | -3.5589175 | -0.5569729 | 0.00779087 | Kcnc4       |
| ENSMUSG000000036769.14 | -7.0203656 | -10.841208 | -3.199523  | 0.00087007 | Wdr44       |
| ENSMUSG000000030330.15 | -1.7128637 | -3.0988688 | -0.3268585 | 0.0152696  | Ing4        |
| ENSMUSG000000033335.17 | -2.3027727 | -4.1052829 | -0.5002624 | 0.01239348 | Dnm2        |
| ENSMUSG000000053600.7  | -6.1756031 | -9.8641869 | -2.4870194 | 0.00182422 | Zfp472      |
| ENSMUSG000000041141.7  | -1.8346174 | -3.4089216 | -0.2603131 | 0.02176054 | Pnmal1      |
| ENSMUSG000000074093.4  | -1.5384197 | -2.9362015 | -0.1406379 | 0.03015409 | Svip        |
| ENSMUSG000000015937.14 | -1.588526  | -2.9509573 | -0.2260947 | 0.02169508 | H2afy       |
| ENSMUSG00000027566.14  | 0.38433079 | 0.0495216  | 0.71913998 | 0.02375892 | Psm2a7      |
| ENSMUSG000000028873.16 | -6.1328017 | -9.9393919 | -2.3262115 | 0.00244926 | Cdca8       |
| ENSMUSG000000036893.17 | -2.2800491 | -3.9661623 | -0.5939358 | 0.00854956 | Ehmt1       |
| ENSMUSG000000039994.15 | -3.2743314 | -4.9351048 | -1.613558  | 0.00048433 | Timeless    |
| ENSMUSG00000010277.7   | -1.5812333 | -3.0403542 | -0.1221124 | 0.0328385  | 2610507B11  |
| ENSMUSG000000030987.5  | -0.6673747 | -1.2346377 | -0.1001118 | 0.02057455 | Stim1       |
| ENSMUSG000000049047.11 | -2.2272419 | -3.8539174 | -0.6005665 | 0.00786327 | Armcx3      |
| ENSMUSG000000003500.13 | -1.8502141 | -3.2994364 | -0.4009917 | 0.01244569 | lmpdh1      |
| ENSMUSG000000043346.8  | -3.1327234 | -4.8799061 | -1.3855408 | 0.00106094 | Gm6741      |
| ENSMUSG000000021027.15 | -1.4281467 | -2.778507  | -0.0777864 | 0.0374468  | Ralgapa1    |
| ENSMUSG000000047264.8  | -1.6114369 | -3.0329145 | -0.1899593 | 0.02551104 | Zfp358      |
| ENSMUSG000000074884.12 | -2.5848248 | -4.4641306 | -0.7055191 | 0.00762602 | Serf2       |
| ENSMUSG000000054387.13 | -1.7182205 | -3.2696789 | -0.166762  | 0.02912761 | Mdm4        |
| ENSMUSG000000025016.10 | -0.8580702 | -1.4409756 | -0.2751647 | 0.0047561  | Tm9sf3      |
| ENSMUSG000000060216.15 | -1.5978028 | -3.0507401 | -0.1448655 | 0.03029266 | Arrb2       |
| ENSMUSG000000031708.16 | -0.4298013 | -0.8036732 | -0.0559293 | 0.02355806 | Tecr        |
| ENSMUSG000000049760.5  | -0.8785534 | -1.6127556 | -0.1443512 | 0.01859312 | 2410015M2C  |
| ENSMUSG000000007850.16 | -2.2869927 | -4.097417  | -0.4765684 | 0.01331147 | Hnrrph1     |
| ENSMUSG000000073664.11 | -0.9908812 | -1.9438919 | -0.0378704 | 0.04096633 | Nbeal1      |
| ENSMUSG000000020794.13 | -5.5494186 | -9.8054652 | -1.2933719 | 0.01086769 | Ube2g1      |
| ENSMUSG000000032497.15 | -2.3632302 | -4.0980856 | -0.6283749 | 0.00813929 | Lrrrip2     |
| ENSMUSG000000049957.14 | -2.3580292 | -4.2339247 | -0.4821336 | 0.01373218 | Ccdc137     |
| ENSMUSG00000002210.6   | 1.34641444 | 0.03794643 | 2.65488246 | 0.04323597 | Dhrs4       |
| ENSMUSG000000038806.7  | -1.7305223 | -3.035619  | -0.4274828 | 0.0096375  | Sde2        |
| ENSMUSG000000027363.15 | -1.6011218 | -3.005833  | -0.1964106 | 0.02474715 | Usp8        |
| ENSMUSG000000032870.8  | -1.8822882 | -3.2396635 | -0.5249129 | 0.00721358 | Smad2       |
| ENSMUSG000000021650.6  | -1.6271989 | -2.9843931 | -0.2700048 | 0.01837623 | Ptcd2       |
| ENSMUSG000000060098.11 | -2.5012141 | -4.2526506 | -0.7497776 | 0.00588967 | Prrmt7      |
| ENSMUSG000000022295.7  | -1.8586386 | -3.4496184 | -0.2676588 | 0.02144679 | Atp6v1c1    |
| ENSMUSG000000038668.14 | -0.7162402 | -1.427642  | -0.0048385 | 0.04832644 | Lpar1       |
| ENSMUSG000000011751.16 | -2.0577809 | -3.6252992 | -0.4902626 | 0.01039846 | Sptbn4      |
| ENSMUSG00000105753.1   | -1.6776056 | -3.1178312 | -0.03738   | 0.04460478 | Gm43847     |
| ENSMUSG000000032537.14 | -1.9190167 | -3.6708977 | -0.1671358 | 0.03095647 | Ephb1       |
| ENSMUSG000000053293.9  | -7.5096316 | -11.6129   | -3.4063629 | 0.0008985  | Pom121      |
| ENSMUSG000000052676.16 | -2.1006826 | -3.5672569 | -0.6341083 | 0.0057679  | Zmat1       |
| ENSMUSG000000025439.5  | -1.4309814 | -2.7073792 | -0.1545836 | 0.02719486 | Clns1a      |
| ENSMUSG000000038451.13 | -2.2418433 | -3.9387981 | -0.5448884 | 0.00997666 | Spsb2       |
| ENSMUSG000000067870.5  | -4.7136065 | -8.3405568 | -1.0866561 | 0.01110199 | Rpl31-ps8   |
| ENSMUSG000000037710.8  | -1.7182502 | -3.3344526 | -0.1020478 | 0.03641805 | Cisd1       |
| ENSMUSG000000054237.5  | -2.2631886 | -4.230084  | -0.2962933 | 0.02343433 | Fra10ac1    |
| ENSMUSG000000086841.1  | 1.85496689 | 0.1005465  | 3.60938728 | 0.03750219 | 2410006H16I |
| ENSMUSG000000037032.16 | -0.6097075 | -1.1875832 | -0.0318318 | 0.03792452 | Apbb1       |
| ENSMUSG000000097312.1  | -3.5383994 | -7.0164763 | -0.0603225 | 0.04583983 | Gm26870     |
| ENSMUSG00000026617.16  | -1.6733332 | -3.3403835 | -0.0662828 | 0.04906577 | Bpnt1       |
| ENSMUSG000000030647.8  | 1.47238074 | 0.02156493 | 2.92319656 | 0.04641321 | Ndufc2      |
| ENSMUSG000000038365.8  | -2.7585244 | -4.5867035 | -0.9303452 | 0.00398174 | Fbxo25      |
| ENSMUSG000000047989.11 | 0.63610971 | 0.18793767 | 1.08428174 | 0.00614694 | Ino80c      |
| ENSMUSG00000026238.14  | -0.5595081 | -1.113461  | -0.0055551 | 0.04755165 | Ptma        |
| ENSMUSG000000036782.13 | 0.90267798 | 0.30356004 | 1.50179592 | 0.00402434 | Klhl13      |
| ENSMUSG00000024962.13  | -1.5822375 | -2.8949336 | -0.2695413 | 0.01779531 | Vegfb       |
| ENSMUSG00000006024.13  | -1.4959827 | -2.8990401 | -0.0929254 | 0.03585603 | Napa        |
| ENSMUSG000000041645.13 | -0.3683744 | -0.6811209 | -0.0556279 | 0.02043143 | Ddx24       |
| ENSMUSG000000032393.14 | -2.1720261 | -3.7207035 | -0.6233487 | 0.0066753  | Dpp8        |
| ENSMUSG000000068747.14 | -1.8142767 | -3.3705844 | -0.2579689 | 0.02171611 | Sort1       |
| ENSMUSG000000034958.11 | -0.9427228 | -1.6615199 | -0.2239257 | 0.01046251 | Atcay       |
| ENSMUSG000000049252.17 | -2.1138315 | -3.9173672 | -0.3102958 | 0.02103893 | Lrp1b       |
| ENSMUSG000000030811.14 | -0.9463577 | -1.8205129 | -0.0722024 | 0.03301967 | Fbxl19      |
| ENSMUSG000000082519.1  | -7.3613892 | -11.21432  | -3.5084584 | 0.00063041 | Vamp7-ps    |
| ENSMUSG000000097730.3  | -4.1302483 | -7.6207484 | -0.6397483 | 0.01988228 | Gm26588     |
| ENSMUSG000000027835.11 | -1.5415382 | -2.9572622 | -0.1258142 | 0.03199265 | Ptcd10      |
| ENSMUSG000000051166.9  | -1.7541433 | -3.3001573 | -0.2081293 | 0.02540422 | Emi5        |
| ENSMUSG000000031667.16 | -2.0003095 | -3.5735607 | -0.4270583 | 0.01277604 | Aktip       |

|                       |            |            |            |            |             |
|-----------------------|------------|------------|------------|------------|-------------|
| ENSMUSG00000069892.9  | -5.8768039 | -9.2576192 | -2.4959885 | 0.00135925 | 993011121F  |
| ENSMUSG00000062098.11 | -0.4228672 | -0.8336113 | -0.0121231 | 0.04312452 | Btb3        |
| ENSMUSG00000024942.16 | -1.8210011 | -3.1822633 | -0.4597389 | 0.00918664 | Capn1       |
| ENSMUSG00000032101.6  | -2.0967153 | -3.8253879 | -0.3680426 | 0.01713117 | Ddx25       |
| ENSMUSG00000038909.16 | -1.603991  | -3.1611058 | -0.0468762 | 0.04299705 | Kat7        |
| ENSMUSG00000037916.13 | -1.6521767 | -3.2557053 | -0.0486482 | 0.04294664 | Ndufv1      |
| ENSMUSG00000020098.6  | -7.5177276 | -11.258975 | -3.7764804 | 0.00041212 | Pcbd1       |
| ENSMUSG00000024431.14 | -1.6746299 | -3.0129451 | -0.3363147 | 0.01413086 | Nr3c1       |
| ENSMUSG00000028741.13 | -1.8258448 | -3.4628431 | -0.1888466 | 0.02799425 | Mrt6a       |
| ENSMUSG00000027665.13 | -1.1708274 | -1.9850777 | -0.3565771 | 0.00561398 | Pik3ca      |
| ENSMUSG00000040479.11 | 0.64485344 | 0.05021009 | 1.23949678 | 0.03271495 | Dgkz        |
| ENSMUSG00000020721.16 | -1.6448186 | -3.2572808 | -0.0323565 | 0.04521821 | Helz        |
| ENSMUSG00000093445.7  | -6.7188738 | -10.575473 | -2.8622749 | 0.00133534 | Lrhd4       |
| ENSMUSG00000034488.14 | -0.879959  | -1.5758146 | -0.1841034 | 0.01322287 | Edil3       |
| ENSMUSG00000029557.7  | -1.6886199 | -3.3565306 | -0.0207093 | 0.04698607 | Mrm2        |
| ENSMUSG00000038527.9  | -6.9409126 | -10.820182 | -3.061643  | 0.00107914 | C1rl        |
| ENSMUSG00000029344.14 | -6.1649492 | -10.266493 | -2.0634056 | 0.0040946  | Tpst2       |
| ENSMUSG00000025545.9  | -2.1563952 | -4.1402519 | -0.1725386 | 0.0323     | Cybl        |
| ENSMUSG00000027957.13 | -7.5949395 | -11.445405 | -3.7444735 | 0.00048246 | Slc35a3     |
| ENSMUSG00000032297.11 | -1.8093874 | -3.4282478 | -0.190527  | 0.02766733 | Celf6       |
| ENSMUSG00000039419.17 | -1.7811527 | -3.2721802 | -0.2901252 | 0.0187838  | Cntnap2     |
| ENSMUSG00000024474.5  | -1.7515275 | -3.3156867 | -0.1873683 | 0.02737651 | Ik          |
| ENSMUSG00000032609.12 | -2.5304299 | -4.4168264 | -0.6440333 | 0.00902073 | Klhdcb8     |
| ENSMUSG00000105679.1  | -5.7047639 | -9.6045486 | -1.8049792 | 0.00497335 | Gm43338     |
| ENSMUSG00000027782.10 | -2.3365159 | -4.1601665 | -0.5128654 | 0.01216707 | Kpna4       |
| ENSMUSG00000057176.4  | -1.6290466 | -3.2277511 | -0.030342  | 0.04546546 | Ccdc189     |
| ENSMUSG00000021103.12 | -1.4515934 | -2.8335557 | -0.069631  | 0.03883138 | Mnat1       |
| ENSMUSG00000024516.12 | -0.7962352 | -1.3817084 | -0.210762  | 0.008229   | Sec11c      |
| ENSMUSG00000102935.1  | 4.1819784  | 0.28219498 | 8.08176181 | 0.03476625 | Gm38355     |
| ENSMUSG00000040249.15 | -1.9744225 | -3.6543664 | -0.2944787 | 0.02069831 | Lrp1        |
| ENSMUSG00000039740.6  | -2.5387284 | -4.3457896 | -0.7316672 | 0.00659755 | Alg2        |
| ENSMUSG00000052296.7  | -1.6443228 | -3.1667964 | -0.1218493 | 0.03344869 | Ppp6r1      |
| ENSMUSG00000034175.13 | -2.2580421 | -4.0229238 | -0.4931603 | 0.01227269 | Rhbdd3      |
| ENSMUSG00000021248.8  | -1.7233918 | -3.4133279 | -0.0334557 | 0.04527935 | Tmed10      |
| ENSMUSG00000031683.16 | 0.58060595 | 0.1859705  | 0.9752414  | 0.00477481 | Lsm6        |
| ENSMUSG00000030255.13 | -1.7018539 | -3.2109963 | -0.1927115 | 0.02630683 | Sspn        |
| ENSMUSG00000039041.15 | -1.6559177 | -3.1547806 | -0.1570548 | 0.02952737 | Adrm1       |
| ENSMUSG00000021460.16 | -2.7706823 | -4.7469728 | -0.7943919 | 0.0066931  | Auh         |
| ENSMUSG00000106411.1  | -2.6427961 | -4.7052745 | -0.5803176 | 0.01215863 | Gm42445     |
| ENSMUSG00000031753.16 | -1.113016  | -2.0237114 | -0.2023206 | 0.01635322 | Cog4        |
| ENSMUSG00000076439.12 | -5.1035328 | -8.6771447 | -1.529921  | 0.005889   | Mog         |
| ENSMUSG00000041354.15 | -4.5687234 | -8.14481   | -0.9926369 | 0.01239101 | Rgl2        |
| ENSMUSG00000063687.3  | -6.2920662 | -10.351585 | -2.2325469 | 0.00327134 | Pcdh5       |
| ENSMUSG00000024067.13 | -7.9336369 | -12.137191 | -3.7300825 | 0.0006978  | Dpy30       |
| ENSMUSG0000001020.8   | -5.0815115 | -9.5486028 | -0.6144203 | 0.02503303 | S100a4      |
| ENSMUSG00000035198.9  | -1.6270958 | -3.058273  | -0.1959186 | 0.02511522 | Tubg1       |
| ENSMUSG00000021938.11 | -2.7679252 | -4.4896743 | -1.0461762 | 0.00248964 | Pspc1       |
| ENSMUSG00000034390.16 | -1.5599854 | -3.0950192 | -0.0249516 | 0.04609077 | Cmpj        |
| ENSMUSG00000042671.12 | -1.9514432 | -3.7982531 | -0.1046333 | 0.0376258  | Rgs8        |
| ENSMUSG00000026463.17 | -2.2985002 | -4.0739127 | -0.5230876 | 0.01138068 | Atp2b4      |
| ENSMUSG00000079442.12 | -1.8928099 | -3.492575  | -0.2930447 | 0.01989257 | Stg6lnac4   |
| ENSMUSG00000053550.13 | -2.1248636 | -4.0156587 | -0.2340684 | 0.02682939 | Shisa7      |
| ENSMUSG00000046056.15 | -1.7250094 | -3.2924649 | -0.1575539 | 0.03016919 | Sbsn        |
| ENSMUSG00000048070.4  | -5.9968577 | -10.052636 | -1.9410796 | 0.00460796 | Pirt        |
| ENSMUSG00000026977.17 | -1.769219  | -3.337266  | -0.2047113 | 0.02589233 | 7-Mar       |
| ENSMUSG00000033439.12 | -5.3845148 | -10.176354 | -0.5926755 | 0.02684417 | Trmt13      |
| ENSMUSG00000038608.15 | -1.6528601 | -3.1944904 | -0.1112298 | 0.03480319 | Dock10      |
| ENSMUSG00000034401.16 | -4.9946265 | -9.5817634 | -0.4074896 | 0.03199845 | Spta6       |
| ENSMUSG00000058741.5  | -1.8493052 | -3.4283473 | -0.270263  | 0.02113366 | Rpl32       |
| ENSMUSG00000041629.9  | -1.6835541 | -3.1842901 | -0.182818  | 0.02707776 | Fam104a     |
| ENSMUSG00000030452.15 | -2.0953259 | -3.9650241 | -0.2256277 | 0.02725432 | Bicd1       |
| ENSMUSG00000051616.14 | -7.6209853 | -11.682269 | -3.5597015 | 0.00073191 | C230029F24f |
| ENSMUSG00000022756.15 | -2.2302732 | -4.216171  | -0.2443754 | 0.02692941 | Slc7a4      |
| ENSMUSG00000021242.8  | -0.5401222 | -1.0755795 | -0.004665  | 0.04786615 | Npc2        |
| ENSMUSG00000108189.1  | -5.5699009 | -10.445107 | -0.694695  | 0.02441607 | Gm43887     |
| ENSMUSG00000039671.18 | -0.8699603 | -1.7240048 | -0.0159157 | 0.04554382 | Zmynd8      |
| ENSMUSG0000003929.10  | -1.9149584 | -3.29094   | -0.5389768 | 0.00703875 | Zfp81       |
| ENSMUSG00000012126.16 | -2.1370109 | -3.4824132 | -0.7916087 | 0.00272607 | Ubxm11      |
| ENSMUSG00000075316.11 | -1.802836  | -3.3644609 | -0.2412111 | 0.02298746 | Scn9a       |
| ENSMUSG0000002983.17  | -4.8652215 | -9.6071558 | -0.1232871 | 0.04389219 | Relb        |
| ENSMUSG00000066697.3  | -4.7743226 | -8.6355851 | -0.9130602 | 0.01522076 | Gm10172     |
| ENSMUSG00000025393.12 | -0.5451124 | -1.0355854 | -0.0546394 | 0.02855861 | Atp5b       |
| ENSMUSG0000005362.14  | -1.7017925 | -3.2953137 | -0.1082712 | 0.03554801 | Crbn        |
| ENSMUSG0000002496.9   | -1.8583119 | -3.4936935 | -0.2229303 | 0.02518827 | Tsc2        |
| ENSMUSG00000028165.9  | -2.8737696 | -4.9970053 | -0.7505339 | 0.00849755 | Cisd2       |
| ENSMUSG00000027285.13 | -1.8388657 | -3.4785472 | -0.1991842 | 0.02714445 | Haus2       |
| ENSMUSG0000004360.8   | -1.985609  | -3.6402001 | -0.331018  | 0.01827334 | 9330159F19f |
| ENSMUSG00000024208.15 | -1.5103796 | -2.795513  | -0.2252461 | 0.02070042 | Uqcq2       |
| ENSMUSG00000057963.9  | -1.8042998 | -3.4049016 | -0.203698  | 0.02636426 | Itpk1       |
| ENSMUSG00000048218.5  | -1.7238389 | -3.4371169 | -0.010561  | 0.04848085 | Amigo2      |
| ENSMUSG00000092416.2  | -6.3586943 | -11.539033 | -1.1783559 | 0.01592351 | Zfp141      |
| ENSMUSG00000024713.15 | -2.1649101 | -3.8780277 | -0.4517924 | 0.01327893 | Pcsk5       |
| ENSMUSG00000034681.16 | -1.7499985 | -3.2741698 | -0.2258273 | 0.02372853 | Rnps1       |
| ENSMUSG00000068290.11 | -1.8585729 | -3.6348836 | -0.0822623 | 0.03963513 | Ddrgk1      |
| ENSMUSG0000002320.15  | -4.8420106 | -8.3756858 | -1.3083355 | 0.0078227  | Tm9sf1      |
| ENSMUSG00000023723.17 | -1.604115  | -3.18058   | -0.0276499 | 0.04579491 | Mrps23      |
| ENSMUSG00000048807.2  | -1.6289026 | -3.0341452 | -0.22366   | 0.02244965 | Slc35e4     |
| ENSMUSG00000030809.14 | -5.4681587 | -9.7411111 | -1.1952063 | 0.01225946 | Gcdh        |
| ENSMUSG0000002015.5   | -1.9485655 | -3.4768367 | -0.4202943 | 0.01255064 | Bcap31      |
| ENSMUSG00000034755.18 | -4.4962477 | -7.7477802 | -1.2447152 | 0.0073534  | Pcdh11x     |
| ENSMUSG00000022108.7  | -0.8853059 | -1.429838  | -0.3407739 | 0.00228591 | Iitm2b      |
| ENSMUSG00000086604.2  | -5.5373909 | -9.7798216 | -1.2949601 | 0.01079494 | Gm15510     |
| ENSMUSG00000054942.13 | -1.5750041 | -3.1087916 | -0.0412166 | 0.04370029 | Miga1       |
| ENSMUSG00000067194.6  | -1.9313731 | -3.537483  | -0.3252633 | 0.01804913 | Efl1ax      |
| ENSMUSG00000020300.14 | -2.4413132 | -4.1246605 | -0.7579659 | 0.00528636 | Cpeb4       |
| ENSMUSG00000038486.9  | -0.3496421 | -0.6781839 | -0.0211002 | 0.03622005 | Sv2a        |
| ENSMUSG00000035596.14 | -0.7800558 | -1.3344089 | -0.2257027 | 0.0065251  | Mbeat7      |
| ENSMUSG00000038390.11 | -0.9648736 | -1.6532439 | -0.2765034 | 0.00670239 | Gpr162      |
| ENSMUSG00000043866.11 | 0.60430696 | 0.06972855 | 1.13888537 | 0.02594596 | Taf10       |
| ENSMUSG00000026841.7  | -2.2205759 | -3.9425881 | -0.4985637 | 0.01167397 | Fibcd1      |
| ENSMUSG00000055026.13 | -2.4705795 | -4.3139166 | -0.6272425 | 0.00907152 | Gabrg3      |
| ENSMUSG00000106948.1  | -6.1164593 | -10.481236 | -1.751682  | 0.0067141  | Gm42785     |
| ENSMUSG0000007944.8   | -2.0140191 | -3.618937  | -0.4091011 | 0.01387797 | Ttcb9       |
| ENSMUSG00000022962.14 | -5.6889202 | -9.5907383 | -1.7871021 | 0.00509113 | Gart        |
| ENSMUSG00000028329.13 | -1.5267622 | -2.9445451 | -0.1089793 | 0.0398659  | Xpa         |

|                       |            |            |            |            |            |
|-----------------------|------------|------------|------------|------------|------------|
| ENSMUSG00000038122.8  | -4.2499685 | -7.559198  | -0.9407389 | 0.01198347 | TbclD32    |
| ENSMUSG00000031201.17 | -1.8152876 | -3.3832648 | -0.2473104 | 0.02261255 | BrcC3      |
| ENSMUSG00000085830.1  | -1.7478938 | -3.24285   | -0.2529375 | 0.0213435  | Grin1os    |
| ENSMUSG00000030701.17 | -1.9392236 | -3.3996111 | -0.4788361 | 0.00964625 | Plekhh1    |
| ENSMUSG00000028937.14 | -0.5494176 | -1.066783  | -0.0320522 | 0.03663636 | Acot7      |
| ENSMUSG00000030619.9  | -4.2067998 | -7.5450695 | -0.86853   | 0.01351689 | Eed        |
| ENSMUSG00000020496.8  | -0.3623812 | -0.7215863 | -0.003176  | 0.04783511 | Rnf187     |
| ENSMUSG00000072572.8  | -3.9019523 | -6.2874075 | -1.5164972 | 0.00218227 | Slc39a2    |
| ENSMUSG0000000131.15  | -1.5784237 | -3.0240602 | -0.1327872 | 0.03151516 | Xpo6       |
| ENSMUSG00000041592.16 | -3.8251912 | -7.3967923 | -0.2535901 | 0.0350051  | Sdk2       |
| ENSMUSG00000019809.16 | -6.2538444 | -10.640332 | -1.8673569 | 0.0059587  | Pex3       |
| ENSMUSG00000001228.14 | -4.8332986 | -9.2390649 | -0.4275323 | 0.03070237 | Uhrf1      |
| ENSMUSG00000019978.15 | -2.6998521 | -4.7984133 | -0.6012908 | 0.01184984 | Epb412     |
| ENSMUSG00000033799.9  | -6.1591037 | -10.929485 | -1.3887221 | 0.01158183 | Fam208b    |
| ENSMUSG00000037351.9  | -1.9396695 | -3.5087629 | -0.370576  | 0.01524326 | Actr1b     |
| ENSMUSG00000038884.14 | -1.1615136 | -2.1173388 | -0.2056884 | 0.01693528 | A230050P20 |
| ENSMUSG00000032997.16 | -2.0177768 | -3.8920746 | -0.1434789 | 0.03404059 | Chpf       |
| ENSMUSG00000033781.6  | -4.3786807 | -7.4359801 | -1.3213813 | 0.00577264 | Asb13      |
| ENSMUSG00000046093.9  | -1.7319351 | -3.335294  | -0.1285762 | 0.03342208 | Hpcal4     |
| ENSMUSG00000037503.12 | 1.56804396 | 0.11784014 | 3.01824778 | 0.0324314  | Fam168b    |
| ENSMUSG00000051111.15 | -2.3313617 | -4.4346513 | -0.2280721 | 0.02898868 | SvZc       |
| ENSMUSG00000020038.9  | -2.2128807 | -3.6035452 | -0.8222163 | 0.0026895  | Cry1       |
| ENSMUSG000000110542.1 | 8.12907977 | 3.51580899 | 12.7423505 | 0.00121975 | Gm39139    |
| ENSMUSG00000031837.14 | -1.7851924 | -3.372592  | -0.1977927 | 0.02672033 | Necab2     |
| ENSMUSG00000045777.14 | -3.2794315 | -4.8243528 | -1.7345102 | 0.00025669 | IfftM10    |
| ENSMUSG00000062995.12 | -1.6946899 | -3.302531  | -0.0868488 | 0.03812888 | Ica1       |
| ENSMUSG00000025272.16 | -2.0782903 | -3.7867702 | -0.3698103 | 0.01682836 | Tro        |
| ENSMUSG00000060904.14 | -1.7892044 | -3.3897069 | -0.1887019 | 0.02763811 | Arl1       |
| ENSMUSG00000020706.13 | -2.2027985 | -4.0770866 | -0.3285103 | 0.02070026 | Ftsj3      |
| ENSMUSG00000031885.14 | -6.3980441 | -9.8012593 | -2.9948289 | 0.00072073 | Cbfb       |
| ENSMUSG00000098950.7  | -1.4392592 | -2.7030697 | -0.1754487 | 0.02487189 | Gm28036    |
| ENSMUSG00000031832.15 | -1.4204411 | -2.5097523 | -0.3311299 | 0.01086228 | Taf1c      |
| ENSMUSG00000021822.2  | -1.7291399 | -2.7033687 | -0.754911  | 0.00115127 | Plau       |
| ENSMUSG00000075555.11 | -1.2356342 | -2.2001659 | -0.2711025 | 0.0121767  | Gm10863    |
| ENSMUSG000000110540.1 | -1.6160375 | -2.8355128 | -0.3965622 | 0.00977598 | Gm45743    |
| ENSMUSG000000105294.1 | -1.1584919 | -2.0286942 | -0.2882895 | 0.0094846  | Gm43304    |
| ENSMUSG0000003348.9   | -1.3154377 | -2.18564   | -0.4452353 | 0.0039294  | Mob3a      |
| ENSMUSG00000082088.1  | -0.9964913 | -1.8666937 | -0.1262889 | 0.02409456 | Gm15753    |
| ENSMUSG000000108718.1 | -1.403257  | -2.2734594 | -0.5330547 | 0.00243248 | Gm44749    |
| ENSMUSG00000030670.16 | -2.5047906 | -3.374993  | -1.6345883 | 1.55E-05   | Cyp2r1     |
| ENSMUSG00000098014.1  | -1.3226804 | -2.1928828 | -0.452478  | 0.00377552 | Gm26967    |
| ENSMUSG00000021490.10 | -1.1337057 | -2.1534455 | -0.113966  | 0.02850707 | Slc34a1    |
| ENSMUSG000000109492.1 | -0.3278947 | -0.4774055 | -0.178384  | 0.00019269 | Gm33882    |
| ENSMUSG00000034566.10 | -0.6215879 | -1.2096237 | -0.0335522 | 0.03754981 | Atp5h      |
| ENSMUSG00000025169.6  | -4.5449724 | -7.9926937 | -1.0972511 | 0.01011857 | Ogfd3      |
| ENSMUSG00000046364.14 | 0.31825097 | 0.02852866 | 0.60797329 | 0.03048197 | Rpl27a     |
| ENSMUSG00000029478.16 | -1.8297074 | -3.4323858 | -0.227029  | 0.02451958 | Ncor2      |
| ENSMUSG00000087479.1  | -4.1116528 | -7.6208586 | -0.6024471 | 0.02107841 | Gm16835    |
| ENSMUSG00000031654.16 | -1.8397384 | -3.5037147 | -0.1757622 | 0.02940186 | Cbhl1      |
| ENSMUSG00000034379.8  | -4.7892992 | -8.5940417 | -0.9845567 | 0.01361208 | Wdr5b      |
| ENSMUSG00000025485.13 | -1.7414697 | -3.4070004 | -0.075939  | 0.0397781  | Ric8a      |
| ENSMUSG00000027109.16 | -2.0002986 | -3.8000093 | -0.2005879 | 0.02855081 | Sp3        |
| ENSMUSG00000022257.3  | -1.6816448 | -3.2505789 | -0.1127106 | 0.03485787 | Laptn4b    |
| ENSMUSG00000030965.19 | -2.3142559 | -4.1632127 | -0.465299  | 0.01410557 | AbraXas2   |
| ENSMUSG00000035754.7  | -2.3698047 | -4.4200905 | -0.319519  | 0.02282825 | Wdr18      |
| ENSMUSG00000040640.10 | -1.595433  | -3.1309465 | -0.0599195 | 0.0411138  | Erc2       |
| ENSMUSG00000022023.5  | -0.9867472 | -1.8094187 | -0.1640757 | 0.01833018 | Wbp4       |
| ENSMUSG00000063063.12 | -0.9091614 | -1.7677032 | -0.0506197 | 0.03719223 | Ctnna2     |
| ENSMUSG00000086944.1  | -4.8863432 | -9.3316062 | -0.4410802 | 0.0303661  | Gm15859    |
| ENSMUSG00000029821.15 | -2.133688  | -3.7987229 | -0.4686532 | 0.01215266 | Gsdme      |
| ENSMUSG00000044982.6  | -2.2811964 | -4.1630122 | -0.3993805 | 0.0171892  | Sfr2d3     |
| ENSMUSG00000056043.5  | -5.5854678 | -9.5190505 | -1.6518851 | 0.00612888 | Rgs9bp     |
| ENSMUSG00000033769.16 | -2.0278651 | -3.968606  | -0.0871242 | 0.03991876 | Exoc6b     |
| ENSMUSG00000034108.5  | -4.9109842 | -8.8738265 | -0.9481419 | 0.01500928 | Ccs        |
| ENSMUSG00000031841.19 | -2.7387482 | -5.258417  | -0.2190794 | 0.03230384 | Cdh13      |
| ENSMUSG00000078619.10 | 1.17466671 | 0.16363861 | 2.18569481 | 0.02214724 | Smarcd2    |
| ENSMUSG00000027263.12 | -0.5320565 | -1.0387589 | -0.0253542 | 0.03889938 | Tubgcp4    |
| ENSMUSG00000033981.14 | -0.5105374 | -1.0207455 | -0.0003293 | 0.0498388  | Gria2      |
| ENSMUSG00000032096.15 | -1.7794747 | -3.2352965 | -0.3236529 | 0.01634045 | Arcn1      |
| ENSMUSG00000034210.13 | -0.9388761 | -1.6538455 | -0.2239067 | 0.01037749 | Efcab14    |
| ENSMUSG00000028218.19 | -1.8617158 | -3.6315674 | -0.0918642 | 0.03853581 | Fam92a     |
| ENSMUSG00000027593.15 | -1.6638073 | -3.2153383 | -0.1122762 | 0.03476571 | Raly       |
| ENSMUSG00000068263.11 | -5.7213417 | -9.8337143 | -1.6089692 | 0.00705442 | Eficc1     |
| ENSMUSG00000023238.14 | -2.3462572 | -4.110927  | -0.5815875 | 0.00956572 | Ache       |
| ENSMUSG00000033773.14 | -4.5651619 | -8.0044202 | -1.1259036 | 0.00967092 | Rpap2      |
| ENSMUSG00000027770.5  | -1.8724971 | -3.5511674 | -0.1938268 | 0.02797972 | Dhx36      |
| ENSMUSG00000099893.1  | -8.610855  | -13.622411 | -3.5992989 | 0.00148989 | Gm29245    |
| ENSMUSG00000063260.2  | -7.4743256 | -12.063454 | -2.8851972 | 0.00225516 | Syt10      |
| ENSMUSG00000029462.18 | -1.0621256 | -1.8572413 | -0.2670099 | 0.00927432 | Vps29      |
| ENSMUSG00000025026.14 | -1.5063411 | -2.8449975 | -0.1676847 | 0.02663137 | Add3       |
| ENSMUSG000000105974.1 | -5.8491531 | -10.926932 | -0.7713741 | 0.02328467 | Gm43318    |
| ENSMUSG00000022503.10 | -3.9840872 | -7.7014607 | -0.2667137 | 0.03487386 | Nubp1      |
| ENSMUSG00000022442.15 | -2.0602042 | -3.9193378 | -0.2010706 | 0.02903006 | Ttl1       |
| ENSMUSG00000027489.15 | -2.5346008 | -4.6333758 | -0.4358257 | 0.01758879 | Necab3     |
| ENSMUSG00000091811.2  | -2.0845762 | -3.7979431 | -0.3712093 | 0.01681154 | Inafm1     |
| ENSMUSG00000056214.8  | -5.9998514 | -10.270388 | -1.7293146 | 0.00659602 | Par6g      |
| ENSMUSG00000022552.15 | -1.8072911 | -3.5490508 | -0.0655314 | 0.04140374 | Sharpin    |
| ENSMUSG00000004561.14 | -5.6874089 | -10.582207 | -0.792611  | 0.02213881 | Mettl17    |
| ENSMUSG00000053877.12 | -2.8174321 | -4.7684755 | -0.8663887 | 0.00544848 | Srcap      |
| ENSMUSG00000031482.9  | -6.4606604 | -10.887038 | -2.0342824 | 0.00505262 | Slc25a15   |
| ENSMUSG0000000731.15  | -5.3269803 | -10.195448 | -0.4585124 | 0.03114792 | Aire       |
| ENSMUSG00000028863.13 | -1.6935603 | -3.0199613 | -0.3671593 | 0.0124386  | Meaf6      |
| ENSMUSG00000028518.8  | -5.5950007 | -9.9636391 | -1.2263623 | 0.01219811 | Prka2      |
| ENSMUSG00000023017.9  | -1.9060024 | -3.7545451 | -0.0574598 | 0.04278618 | Asic1      |
| ENSMUSG00000057497.8  | -5.1817473 | -9.2121494 | -1.1513452 | 0.01190079 | Fam136a    |
| ENSMUSG00000025173.13 | -1.0805479 | -2.1085112 | -0.0525845 | 0.03868162 | Wdr45b     |
| ENSMUSG00000029171.12 | -7.1723762 | -12.417692 | -1.9270603 | 0.00793385 | Pgm1       |
| ENSMUSG00000027939.11 | -5.4484443 | -9.4666738 | -1.4302148 | 0.00839546 | Nup210l    |
| ENSMUSG00000026019.15 | -0.7081785 | -1.3856827 | -0.0306744 | 0.03984193 | Wdr12      |
| ENSMUSG00000022951.15 | -1.5507022 | -2.982948  | -0.1184564 | 0.03300137 | Rcan1      |
| ENSMUSG00000004961.7  | -1.8580415 | -3.517536  | -0.198547  | 0.02739659 | Syt5       |
| ENSMUSG00000038347.14 | -7.3702092 | -12.796129 | -1.9442892 | 0.00829642 | Tctc2      |
| ENSMUSG00000029922.15 | 2.43287448 | 0.4892281  | 4.37652086 | 0.01410194 | Mkrm1      |
| ENSMUSG00000033460.14 | -6.0052301 | -10.143115 | -1.8673448 | 0.00526054 | Armcx1     |
| ENSMUSG00000039307.16 | -7.0858491 | -11.495351 | -2.6763476 | 0.00249754 | Hexdc      |

ENSMUSG00000092286.1 -2.5447071 -4.3164513 -0.772963 0.00565927 Dtnbos
ENSMUSG00000008446.3 2.1494798 0.2276281 4.07133151 0.02756293 Rpl10a-ps1
ENSMUSG00000036537.6 -6.1420804 -10.513692 -1.770469 0.00659435 Rnf113a1
ENSMUSG00000049470.13 -1.8410372 -3.5918528 -0.0902216 0.03860832 Aff4
ENSMUSG00000063888.6 -1.4480448 -2.8772878 -0.0188018 0.04681244 Rpl71
ENSMUSG00000099960.1 -9.6468032 -14.612967 -4.6806395 0.00054887 Gm28590
ENSMUSG00000042401.6 -1.8191631 -3.6158653 -0.022461 0.04696608 Crtac1
ENSMUSG000000052544.9 -6.0683037 -11.007688 -1.1289196 0.01583685 St6galnac3
ENSMUSG00000038205.12 -1.9347807 -3.594249 -0.2753124 0.02170005 Prkab2
ENSMUSG000000078899.9 -1.9288286 -3.6867696 -0.1708876 0.03067614 Gm4631
ENSMUSG00000031808.7 -2.2647448 -4.443011 -0.0864786 0.04097395 Slc27a1
ENSMUSG000000021798.13 -7.2861879 -11.571898 -3.0004778 0.00161891 Ldb3
ENSMUSG00000031388.14 -4.9263668 -8.8816885 -0.9710452 0.01454685 Naa10
ENSMUSG000000039159.16 -1.1090383 -1.9546803 -0.2633962 0.0104653 Ube2h
ENSMUSG000000021905.13 -4.9093296 -8.7689774 -1.0496819 0.01274329 Dph3
ENSMUSG000000019338.13 -1.8223144 -3.5320194 -0.1126094 0.03592212 Zfp687
ENSMUSG000000039515.11 -2.1987687 -4.3716761 -0.0258613 0.04710738 Ptpa
ENSMUSG000000060181.5 0.75256867 0.14640862 1.35872871 0.01483901 Slc35e3
ENSMUSG000000026820.5 -1.9746304 -3.6306214 -0.3186394 0.01898939 Piges2
ENSMUSG000000052512.17 -2.0182374 -3.9501857 -0.0862891 0.03996452 Nav2
ENSMUSG000000047945.6 -2.5169977 -4.4764512 -0.575442 0.01196773 Marcks11
ENSMUSG000000078653.4 0.80911384 0.00307301 1.61515467 0.04905505 Cntd1
ENSMUSG000000024457.16 -2.6275982 -4.9866127 -0.2685838 0.02820773 Trim26
ENSMUSG000000058070.14 -2.370285 -4.4096931 -0.3308769 0.02210401 Eml1
ENSMUSG00000002247.12 -2.2317052 -4.2021478 -0.2612626 0.02566577 Brix1
ENSMUSG000000040356.16 -5.2889024 -9.9376513 -0.6401535 0.02501276 Skiv27
ENSMUSG000000020153.14 -0.7872466 -1.5523601 -0.0221331 0.04325178 Ndufs7
ENSMUSG000000032399.7 -0.5560698 -1.0618868 -0.0502528 0.03034699 Rpl4
ENSMUSG000000017764.2 -5.2012861 -9.095585 -1.3069873 0.00928339 Zswim1
ENSMUSG000000097290.8 4.87997462 0.61040437 9.14954488 0.02435822 1300002E11f
ENSMUSG000000032403.8 -2.4566636 -4.3179498 -0.5953773 0.01003747 2300009A05f
ENSMUSG000000049295.16 -4.9039788 -8.8685538 -0.9394037 0.01518398 Zfp219
ENSMUSG000000006906.10 -1.6308237 -3.2280275 -0.0336199 0.04499588 Stambp
ENSMUSG000000026571.12 -1.9259956 -3.695709 -0.1562821 0.03208301 Dcaf6
ENSMUSG000000031820.9 -1.6845374 -2.8609461 -0.5081288 0.00578034 Babam1
ENSMUSG000000094936.7 -6.5630523 -11.282182 -1.8439223 0.00707237 Rbm4
ENSMUSG000000053091.16 -6.2769395 -10.586594 -1.9672846 0.00512921 Lins1
ENSMUSG000000022858.15 -2.0643441 -3.9799191 -0.148769 0.0385049 Tra2b
ENSMUSG000000033128.8 -0.9653291 -1.7173342 -0.213324 0.01201961 Gga1
ENSMUSG000000083929.3 -4.810291 -8.8817332 -0.7388488 0.02006437 Gm10600
ENSMUSG000000043541.16 -7.5910645 -12.301698 -2.8804311 0.00244497 Casc1
ENSMUSG000000039509.8 -7.2989199 -12.066689 -2.5311508 0.00358312 Nup133
ENSMUSG000000026275.13 -0.739422 -1.4139628 -0.0648811 0.03083472 Ppp1r7
ENSMUSG000000039231.18 -6.1558236 -10.083186 -2.2284616 0.00301057 Suv39h1
ENSMUSG000000037270.18 -0.986761 -1.8439185 -0.1296036 0.02336813 4932438A13f
ENSMUSG000000027339.15 -1.3455825 -2.4669776 -0.2241873 0.01828639 Rassf4
ENSMUSG000000096188.1 -2.2650993 -3.9788708 -0.5513278 0.00994665 Cmtm4
ENSMUSG00000018451.6 -1.7491141 -3.3214963 -0.1767319 0.02841559 6330403K07f
ENSMUSG000000048108.13 -7.0079071 -12.206392 -1.809422 0.00872832 Tmem72
ENSMUSG000000031441.15 -2.5798965 -4.4288499 -0.730943 0.00691455 Atp11a
ENSMUSG000000003166.19 -2.3857809 -4.4491965 -0.3223653 0.0227837 Dgcr2
ENSMUSG000000034413.14 2.14008984 0.0616689 4.21851078 0.04309072 Neur11b
ENSMUSG000000092641.2 -5.9349165 -10.61802 -1.2518128 0.01304346 Gm23563
ENSMUSG000000110711.1 2.65085367 0.55883733 4.74287001 0.01305491 Gm45760
ENSMUSG000000026491.13 -4.8464166 -8.7442201 -0.948613 0.01470308 Ahctf1
ENSMUSG000000032372.14 -5.3808877 -10.716857 -0.0449187 0.04793671 Plscr2
ENSMUSG000000040907.15 -0.5384264 -1.0147421 -0.0621107 0.02595098 Atp1a3
ENSMUSG00000047369.15 -2.2312211 -4.3938218 -0.0686203 0.04264749 Dnah14
ENSMUSG000000017868.16 -6.6664597 -11.422084 -1.9108356 0.00669821 Sgk2
ENSMUSG000000025656.17 -1.9208894 -3.7572067 -0.0845721 0.03968607 Arhgef9
ENSMUSG000000050627.13 -1.807162 -3.570032 -0.0442919 0.04408521 Gpdl1
ENSMUSG000000053693.16 -6.1926792 -11.999275 -0.3860829 0.03580918 Mast1
ENSMUSG000000056917.12 -5.5851638 -10.810287 -0.3600401 0.03537647 Sip1
ENSMUSG000000009535.13 -1.8649436 -3.6738165 -0.0560706 0.04280471 Rnmt
ENSMUSG000000028469.15 -2.1772135 -3.995885 -0.3585419 0.01854315 Npr2
ENSMUSG000000032540.15 -7.0953744 -11.723226 -2.4675225 0.00354389 Abhd5
ENSMUSG000000057738.13 -0.8233038 -1.5800842 -0.0665233 0.03214873 Sptan1
ENSMUSG000000107306.1 -0.811277 -1.6200993 -0.0024547 0.04924634 Gm42577
ENSMUSG000000036062.13 -1.6975496 -3.3945645 -0.0005346 0.04992125 Phf24
ENSMUSG000000068267.5 -1.7633005 -3.469419 -0.057182 0.04226686 Cenpb
ENSMUSG000000026229.17 -1.2289355 -2.2144892 -0.2433818 0.01444189 Psmd1
ENSMUSG000000041907.9 -5.7030203 -9.3100371 -2.0960035 0.00282168 Gpr45
ENSMUSG000000097022.2 -6.9859323 -11.582735 -2.3891292 0.00377972 BC001981
ENSMUSG000000044148.6 2.20033702 0.00395358 4.39672046 0.04955166 1810030007
ENSMUSG000000024270.11 -1.9653748 -3.6901675 -0.240582 0.02478937 Slc39a6
ENSMUSG000000037419.8 -2.1679878 -4.0592157 -0.2767599 0.02394777 Endod1
ENSMUSG000000040044.11 -1.580241 -3.1052793 -0.0552028 0.04170139 Orc3
ENSMUSG000000031812.16 -0.5890724 -1.1159383 -0.0622065 0.02761483 Map1lc3b
ENSMUSG000000100813.1 -6.554333 -10.828066 -2.2828003 0.00352539 Gm28874
ENSMUSG000000021549.13 -1.3046011 -2.3387075 -0.2704947 0.01342259 Rasa1
ENSMUSG000000040339.10 2.13348806 0.1893691 4.07760701 0.03064567 Fam102b
ENSMUSG000000040721.9 -1.1967456 -2.1424456 -0.2510457 0.01316424 Zfhx2
ENSMUSG000000029576.17 -9.0333029 -14.237511 -3.829095 0.00137491 Radil
ENSMUSG000000056851.13 -2.3094032 -4.4636343 -0.1551722 0.03482412 Pcbp2
ENSMUSG000000021772.14 0.97050486 0.08369605 1.85731366 0.03111672 Nkiras1
ENSMUSG000000040329.14 -6.4825149 -11.827499 -1.1375307 0.01713828 Il7
ENSMUSG000000073591.4 -5.9844731 -10.20444 -1.7645058 0.00618342 Pcdhb22
ENSMUSG000000021983.15 -7.6971527 -13.198175 -2.1961308 0.00678363 Atp8a2
ENSMUSG00000005702.9 -0.5269612 -1.045972 -0.0093253 0.04568574 Selenom
ENSMUSG000000030270.11 -2.1072454 -4.1948892 -0.0196016 0.04770406 Cpn9e
ENSMUSG00000002925.16 -4.6308306 -8.74248 -0.5191811 0.02649649 Ccdc43
ENSMUSG000000091318.2 -5.9562525 -9.4627769 -2.4497281 0.00163007 Gm5415
ENSMUSG000000048920.8 -1.5459697 -3.0659676 -0.0259718 0.04589892 Frkr
ENSMUSG000000097527.2 -7.3755303 -12.282849 -2.4682119 0.00409686 1700112116F
ENSMUSG000000015755.16 -2.0283755 -3.8436065 -0.2131444 0.02770529 Tab2
ENSMUSG000000048040.8 -2.0848581 -3.8941847 -0.2755315 0.02324103 Arxes2
ENSMUSG000000027395.15 -2.1740178 -4.0330098 -0.3150258 0.02131487 Polr1b
ENSMUSG000000100826.6 -0.6720794 -1.1901613 -0.1539974 0.01123329 Snhg14
ENSMUSG000000079492.2 -5.5273516 -9.7997502 -1.254953 0.01143148 Gm11127
ENSMUSG000000000568.15 -1.2781801 -2.2033433 -0.3530169 0.00739827 Hnrnpd
ENSMUSG000000095280.1 -5.0385533 -10.012446 -0.0646602 0.04684886 Gm21738
ENSMUSG000000037149.9 -1.976645 -3.9114079 -0.0418821 0.04486114 Ddk1
ENSMUSG000000103825.1 -5.6812976 -10.983009 -0.3795857 0.03490039 Gm38178
ENSMUSG000000017943.15 -1.1764223 -2.1495882 -0.2028964 0.01751864 Gdap1f1
ENSMUSG000000026150.14 -2.1577162 -4.1573699 -0.1580625 0.03361569 Mff

|                       |            |            |            |            |             |
|-----------------------|------------|------------|------------|------------|-------------|
| ENSMUSG00000041594.17 | -4.6562468 | -8.9730121 | -0.3394814 | 0.03368388 | Tmtc4       |
| ENSMUSG00000106671.1  | -5.0514913 | -9.3404315 | -0.7625511 | 0.02043906 | Gm42900     |
| ENSMUSG00000029700.11 | -5.8294356 | -11.411328 | -0.2475432 | 0.04002821 | Slc13a1     |
| ENSMUSG00000039844.19 | -1.9756541 | -3.9102996 | -0.0410086 | 0.04496256 | Rapgef1     |
| ENSMUSG00000025234.11 | -3.0301213 | -5.4989503 | -0.5612924 | 0.01593272 | Arlh1       |
| ENSMUSG00000047789.4  | -2.4363342 | -4.5596621 | -0.3130062 | 0.02381848 | Slc38a9     |
| ENSMUSG00000033760.16 | -2.0873555 | -3.7732897 | -0.4014214 | 0.01509663 | Rbm4b       |
| ENSMUSG00000052613.16 | -1.8370724 | -3.4420446 | -0.2321002 | 0.0241569  | Pcdh15      |
| ENSMUSG00000021589.12 | -6.402968  | -10.24708  | -2.5588556 | 0.00189835 | Rhobtb3     |
| ENSMUSG00000017715.11 | -7.3633221 | -12.488475 | -2.2381696 | 0.0056474  | Pgs1        |
| ENSMUSG00000078572.3  | 0.92932516 | 0.19673757 | 1.66191274 | 0.01296239 | Ndufaf8     |
| ENSMUSG00000024487.4  | -2.2398116 | -4.3626841 | -0.1169391 | 0.03792432 | Yipf5       |
| ENSMUSG00000026840.14 | -6.6421754 | -11.447651 | -1.8366995 | 0.00737511 | Lamc3       |
| ENSMUSG00000025742.5  | -6.0974575 | -11.116164 | -1.0787511 | 0.01695643 | Prps2       |
| ENSMUSG00000029036.18 | -1.7819267 | -3.5600022 | -0.0038511 | 0.04946102 | Atad3a      |
| ENSMUSG00000065097.1  | 1.8912883  | 0.36989092 | 3.41268568 | 0.01472117 | Snora16a    |
| ENSMUSG00000032551.6  | -5.8831857 | -10.679235 | -1.0871359 | 0.01598705 | 1110059G10  |
| ENSMUSG00000070867.4  | -1.504734  | -2.8229802 | -0.1864878 | 0.024543   | Trabd2b     |
| ENSMUSG00000029712.14 | -4.5032784 | -8.8581592 | -0.1483976 | 0.0421481  | Actl6b      |
| ENSMUSG00000092558.3  | -2.0230162 | -3.502816  | -0.5432165 | 0.00794556 | Med20       |
| ENSMUSG00000013419.6  | -1.2706588 | -2.3396241 | -0.2016936 | 0.01934952 | Zfp651      |
| ENSMUSG00000022472.16 | -0.7611704 | -1.3115693 | -0.2107714 | 0.00734855 | Desi1       |
| ENSMUSG00000090353.2  | -5.0008397 | -9.4567894 | -0.54489   | 0.02703436 | Gm17555     |
| ENSMUSG00000062044.15 | -1.9201596 | -3.673851  | -0.1664682 | 0.0310313  | Lmtk3       |
| ENSMUSG00000029405.16 | -2.095123  | -4.0304106 | -0.1598353 | 0.0330208  | G3bp2       |
| ENSMUSG00000031904.5  | -5.1479084 | -9.9873537 | -0.3084632 | 0.03630845 | Sic7a6      |
| ENSMUSG00000071073.4  | 0.52442683 | 0.02238703 | 1.02646663 | 0.03997902 | Lrrc73      |
| ENSMUSG00000091735.2  | -4.3868014 | -8.4270797 | -0.3465231 | 0.03249653 | Gpr62       |
| ENSMUSG00000038976.12 | -0.7359025 | -1.3116366 | -0.1601684 | 0.01235258 | Ppp1r9b     |
| ENSMUSG00000109865.1  | -5.8252198 | -10.497967 | -1.152473  | 0.01464468 | Hspa14      |
| ENSMUSG00000036402.13 | 2.27410329 | 0.58716901 | 3.96103758 | 0.00872825 | Gng12       |
| ENSMUSG00000034105.9  | -5.885778  | -10.40812  | -1.3634365 | 0.01099838 | Tlcl1       |
| ENSMUSG00000003421.13 | -1.7712484 | -3.276309  | -0.2661877 | 0.02053528 | Nosip       |
| ENSMUSG00000017716.15 | -6.0711092 | -10.262895 | -1.8793236 | 0.00533643 | Birc5       |
| ENSMUSG00000032410.13 | -0.4706425 | -0.9154509 | -0.0258341 | 0.03735742 | Xrn1        |
| ENSMUSG00000028960.18 | -1.0108764 | -1.7457606 | -0.2759922 | 0.00762061 | Ube4b       |
| ENSMUSG00000053166.14 | -2.2941608 | -4.4247201 | -0.1636016 | 0.03399993 | Cdh22       |
| ENSMUSG00000063884.6  | 2.76119607 | 0.51704842 | 5.00534372 | 0.01569104 | Ptcd3       |
| ENSMUSG00000020780.15 | -2.4432872 | -4.5638496 | -0.3227247 | 0.02325225 | Srp68       |
| ENSMUSG00000029376.8  | 5.64579638 | 1.3887145  | 9.90287826 | 0.00972652 | Mthfd2l     |
| ENSMUSG00000021701.7  | -8.775597  | -14.455179 | -3.0959402 | 0.00334798 | Plk2        |
| ENSMUSG00000085748.1  | -6.0276909 | -9.9396978 | -2.1156839 | 0.00341704 | Gm12280     |
| ENSMUSG00000021567.14 | -5.1760944 | -9.3366889 | -1.0185199 | 0.0145851  | Nkd2        |
| ENSMUSG00000052026.7  | -2.0282226 | -3.8544581 | -0.2019871 | 0.02867378 | Sic6a7      |
| ENSMUSG00000032869.15 | -2.2725415 | -4.4311455 | -0.1139376 | 0.03836603 | Psmf1       |
| ENSMUSG0000008999.7   | -5.004848  | -8.726812  | -1.282884  | 0.00887587 | Bmp7        |
| ENSMUSG00000036452.17 | -0.7673838 | -1.5299001 | -0.0048675 | 0.04842765 | Arhgap26    |
| ENSMUSG00000034154.15 | -5.2561518 | -9.9631205 | -0.5491832 | 0.02780959 | Ino80       |
| ENSMUSG00000036186.5  | 2.77239303 | 0.56660858 | 4.97817747 | 0.01374188 | Fam69b      |
| ENSMUSG00000028637.15 | -3.3545843 | -6.686739  | -0.0224296 | 0.04834339 | Ccdc30      |
| ENSMUSG00000019951.9  | -2.0872951 | -3.9894543 | -0.1851358 | 0.03065754 | Uhrf1bp1l   |
| ENSMUSG00000034171.13 | -4.368602  | -8.5518201 | -0.1853839 | 0.04003453 | Faah        |
| ENSMUSG00000019428.16 | -1.8285779 | -3.4783179 | -0.1788379 | 0.02899339 | Fkbp8       |
| ENSMUSG00000027168.21 | -2.7640639 | -5.1380673 | -0.3900605 | 0.0218755  | Pax6        |
| ENSMUSG00000037791.15 | -5.0245879 | -9.2399446 | -0.8092312 | 0.01903184 | Phf12       |
| ENSMUSG00000089833.1  | -4.5506999 | -8.7065537 | -0.3947461 | 0.03102211 | Fhitos      |
| ENSMUSG00000064061.13 | -0.9701529 | -1.6781712 | -0.2621346 | 0.00782312 | Drip3       |
| ENSMUSG00000034610.14 | -1.7732074 | -3.5225025 | -0.0239122 | 0.04669188 | Zcchc11     |
| ENSMUSG00000039452.5  | -2.5858214 | -4.6081215 | -0.5635213 | 0.01232455 | Smr22       |
| ENSMUSG00000050708.16 | -0.6825538 | -1.3097149 | -0.0553928 | 0.03208078 | Fhl1        |
| ENSMUSG00000033697.15 | -0.8286947 | -1.6080778 | -0.0493116 | 0.03639431 | Arhgap39    |
| ENSMUSG00000021265.3  | -1.8488454 | -3.3869824 | -0.3107085 | 0.01809574 | Sic25a29    |
| ENSMUSG00000030685.5  | -6.5711502 | -10.84509  | -2.2972107 | 0.00347174 | Kctd13      |
| ENSMUSG00000022438.6  | -2.7583271 | -4.6795332 | -0.8371211 | 0.00567434 | Parvb       |
| ENSMUSG00000022781.8  | -2.2048536 | -4.2317285 | -0.1779786 | 0.03216391 | PaK2        |
| ENSMUSG0000001151.9   | -1.1983207 | -2.3414542 | -0.0551872 | 0.03924524 | Pcnt        |
| ENSMUSG00000057667.7  | -7.9691531 | -13.238114 | -2.7001921 | 0.00391384 | Bloc1s3     |
| ENSMUSG00000106446.1  | -3.8905798 | -7.5203413 | -0.2608184 | 0.03485497 | Gm42970     |
| ENSMUSG00000073728.10 | -4.2673998 | -8.138059  | -0.3967406 | 0.02986908 | Tmem51os1   |
| ENSMUSG00000032307.16 | -5.6538698 | -10.099384 | -1.2083552 | 0.01275276 | Ube2q2      |
| ENSMUSG00000097164.1  | -2.2872769 | -3.9430475 | -0.6315062 | 0.00740466 | Cep83os     |
| ENSMUSG00000025795.7  | -5.0198263 | -9.5299288 | -0.5097237 | 0.02832684 | Rassf3      |
| ENSMUSG00000108867.1  | -4.5040089 | -8.426931  | -0.5810867 | 0.02373307 | Gm44643     |
| ENSMUSG00000024772.9  | -2.4121698 | -4.5931315 | -0.2312081 | 0.02934499 | Ehd1        |
| ENSMUSG00000042208.15 | -0.8926107 | -1.6839154 | -0.101306  | 0.02626338 | 0610010F051 |
| ENSMUSG00000062373.7  | -2.2030809 | -4.2606496 | -0.1455122 | 0.03505472 | Tmem65      |
| ENSMUSG00000110529.1  | -4.904333  | -9.4069513 | -0.4017146 | 0.03193646 | Gm45694     |
| ENSMUSG00000038671.15 | -2.2030772 | -4.3213735 | -0.084781  | 0.0409076  | Arfrp1      |
| ENSMUSG00000068663.13 | -0.8254067 | -1.5374359 | -0.1133774 | 0.0224417  | Clec16a     |
| ENSMUSG00000042275.8  | -2.267335  | -4.449128  | -0.085542  | 0.04107567 | Pelo        |
| ENSMUSG00000100143.1  | 1.10468786 | 0.08347116 | 2.12590455 | 0.03316298 | NA          |
| ENSMUSG00000026914.15 | -3.5827548 | -6.1958425 | -0.9696671 | 0.00779063 | Psm14       |
| ENSMUSG00000061751.15 | -2.3464343 | -4.6517423 | -0.0411262 | 0.04572594 | Kalrn       |
| ENSMUSG00000051786.14 | -2.018782  | -3.995304  | -0.04226   | 0.04492106 | Tubgcp6     |
| ENSMUSG0000001120.15  | -2.5574979 | -4.7036243 | -0.4113716 | 0.01905974 | Pcbp3       |
| ENSMUSG00000027778.15 | -2.3701979 | -4.5993515 | -0.1410443 | 0.03639384 | lft80       |
| ENSMUSG00000107059.1  | -1.8358668 | -3.4081799 | -0.2635538 | 0.02151315 | Gm43629     |
| ENSMUSG00000021807.5  | -1.706069  | -3.4105788 | -0.0015593 | 0.04977165 | Rtraf       |
| ENSMUSG00000029501.14 | -5.0028875 | -9.2617219 | -0.7440532 | 0.02075911 | Ankle2      |
| ENSMUSG00000021669.14 | -2.2792786 | -4.2019687 | -0.3565885 | 0.01966531 | Col4a3bp    |
| ENSMUSG00000045008.1  | -4.6916255 | -8.7068999 | -0.6763511 | 0.02142419 | 9030612E09F |
| ENSMUSG00000097275.1  | -1.8953401 | -3.7260942 | -0.0645861 | 0.04189438 | Gm26648     |
| ENSMUSG00000020069.16 | -4.3016357 | -8.3277031 | -0.2755683 | 0.0354584  | Hnrnp3      |
| ENSMUSG00000025008.15 | -5.8019724 | -10.909408 | -0.6945365 | 0.02523041 | Tctn3       |
| ENSMUSG00000083282.2  | -2.2559394 | -4.2853149 | -0.2258719 | 0.02857578 | Ctsf        |
| ENSMUSG00000051065.8  | -4.1221809 | -7.7552626 | -0.4890992 | 0.02540414 | Mb21d2      |
| ENSMUSG00000048264.15 | -1.9554092 | -3.8289236 | -0.0818947 | 0.04015631 | Dip2c       |
| ENSMUSG00000028955.3  | 3.9115275  | 0.21100631 | 7.6120487  | 0.03755689 | Vamp3       |
| ENSMUSG00000043468.4  | -6.2866092 | -11.253932 | -1.3192859 | 0.01315551 | Adam30      |
| ENSMUSG00000040414.7  | 3.14101544 | 0.03132653 | 6.25070434 | 0.04754077 | Sic25a28    |
| ENSMUSG00000091957.3  | -1.6704949 | -2.485995  | -0.8549948 | 0.00034954 | Rps2-ps10   |
| ENSMUSG00000095325.1  | -5.3208277 | -9.3340263 | -1.3076291 | 0.00974491 | Zfp870      |
| ENSMUSG00000067199.4  | -1.3577152 | -2.3742067 | -0.3412236 | 0.00928007 | Frat1       |
| ENSMUSG00000028871.7  | -4.4498252 | -8.5159347 | -0.3837158 | 0.03111824 | Rspo1       |
| ENSMUSG00000033763.14 | -0.8984816 | -1.7177994 | -0.0791639 | 0.03076705 | Mtssl1      |

|                       |            |            |            |            |             |
|-----------------------|------------|------------|------------|------------|-------------|
| ENSMUSG00000035620.14 | -4.4477694 | -8.0926755 | -0.8028633 | 0.01650916 | Ric8b       |
| ENSMUSG00000016194.14 | -5.1707881 | -10.278805 | -0.0627713 | 0.0470161  | Hsd11b1     |
| ENSMUSG00000033152.13 | -2.3929766 | -4.3138372 | -0.4721161 | 0.01452645 | Podxl2      |
| ENSMUSG00000092248.1  | -5.4713425 | -10.501843 | -0.4408426 | 0.03219235 | Vmn1r-ps63  |
| ENSMUSG00000025362.5  | 0.53112002 | 0.0224863  | 1.03975374 | 0.04005604 | Rps26       |
| ENSMUSG00000030374.15 | -1.8210254 | -3.5339514 | -0.1080995 | 0.03642398 | Strn4       |
| ENSMUSG00000026788.13 | -4.8712453 | -9.4512027 | -0.2912879 | 0.03633382 | Zbtb43      |
| ENSMUSG00000037003.15 | -6.6710084 | -12.279908 | -1.0621085 | 0.01928343 | Tns2        |
| ENSMUSG00000079658.9  | -1.7993306 | -3.5857226 | -0.0129387 | 0.04821968 | Eloc        |
| ENSMUSG00000054863.8  | -2.6550993 | -4.7630641 | -0.5471345 | 0.01355874 | Fam19a5     |
| ENSMUSG00000024639.5  | -1.1416828 | -2.2332504 | -0.0501152 | 0.03971483 | Gnaq        |
| ENSMUSG00000010358.13 | -5.8285038 | -10.910043 | -0.7469647 | 0.02386861 | Ifi35       |
| ENSMUSG00000039787.13 | -5.2725337 | -9.7896751 | -0.7553923 | 0.02155585 | Cercam      |
| ENSMUSG00000004631.15 | -5.49593   | -10.092581 | -0.8992791 | 0.0186842  | Scge        |
| ENSMUSG00000079598.3  | -2.1160793 | -4.0225651 | -0.2095936 | 0.02877017 | Clec2l      |
| ENSMUSG00000044933.2  | 2.05469507 | 0.0323225  | 4.07706765 | 0.04615372 | Sstr3       |
| ENSMUSG00000040659.3  | -1.2755158 | -2.151366  | -0.2356655 | 0.01599019 | Efh2d       |
| ENSMUSG00000020919.11 | -2.9960451 | -5.5785589 | -0.4135313 | 0.02234064 | Stat5b      |
| ENSMUSG00000097206.1  | 5.21034733 | 0.35963594 | 10.0610587 | 0.0344562  | Gm26699     |
| ENSMUSG00000000959.6  | -1.7366497 | -3.2595185 | -0.2137808 | 0.02467772 | Oval1       |
| ENSMUSG00000049521.1  | 1.03761169 | 0.4525355  | 1.62266883 | 0.00115837 | Cdc42ep1    |
| ENSMUSG00000043448.13 | 1.91230023 | 0.01743556 | 3.80716491 | 0.04774898 | Gjc2        |
| ENSMUSG00000100944.1  | -8.50632   | -14.103482 | -2.9091577 | 0.00377938 | Gm28900     |
| ENSMUSG00000060301.5  | -4.7569262 | -8.16555   | -1.3483024 | 0.00690681 | 2610008E11f |
| ENSMUSG00000104145.1  | -4.884333  | -8.1420148 | -1.6266511 | 0.00416924 | D130019J16f |
| ENSMUSG00000027324.1  | -5.1101833 | -9.5436646 | -0.6767021 | 0.02320004 | Rpusd2      |
| ENSMUSG00000073514.3  | -6.8216928 | -12.095934 | -1.5474515 | 0.0114507  | Dok6        |
| ENSMUSG00000056919.9  | -4.9332432 | -9.4318307 | -0.4346557 | 0.03076723 | Cept162     |
| ENSMUSG00000027981.14 | -1.9398781 | -3.8082482 | -0.071508  | 0.04126892 | Rnpc3       |
| ENSMUSG00000050390.12 | -5.3072465 | -10.609066 | -0.0054269 | 0.04974457 | C77080      |
| ENSMUSG00000030556.13 | -1.6906413 | -3.2580917 | -0.123191  | 0.03369225 | Lrrc28      |
| ENSMUSG00000030207.15 | -2.2049896 | -4.3633486 | -0.0466305 | 0.04487071 | Fam234b     |
| ENSMUSG00000029148.15 | -0.5272461 | -0.8500433 | -0.2044488 | 0.00220649 | Nrbp1       |
| ENSMUSG00000050730.16 | -5.5515931 | -10.360475 | -0.742711  | 0.02298931 | Arhgap42    |
| ENSMUSG00000031428.11 | -0.6806556 | -1.3079253 | -0.0533859 | 0.03260455 | Zcchc18     |
| ENSMUSG00000050272.9  | -2.7019893 | -5.2357053 | -0.1682732 | 0.03582303 | Dscam       |
| ENSMUSG00000042389.13 | -1.769776  | -2.9971623 | -0.5423898 | 0.00550603 | Tsen2       |
| ENSMUSG00000021193.9  | -5.3816662 | -10.132527 | -0.6308058 | 0.02564168 | Pitrm1      |
| ENSMUSG00000031960.14 | -2.3545142 | -4.5376096 | -0.1714187 | 0.03370451 | Aars        |
| ENSMUSG00000106981.1  | -2.2101768 | -4.1526268 | -0.2677268 | 0.02499701 | Gm45495     |
| ENSMUSG00000022388.14 | -6.4442435 | -11.953291 | -1.3351958 | 0.01411691 | Ttll8       |
| ENSMUSG00000039842.15 | -1.7626972 | -3.4983774 | -0.0270171 | 0.04625024 | Mcp1        |
| ENSMUSG00000030980.17 | 0.49973599 | 0.09362031 | 0.90585167 | 0.015681   | Knop1       |
| ENSMUSG00000033294.11 | -5.4414544 | -9.8823166 | -1.0005921 | 0.01609639 | Noc4l       |
| ENSMUSG00000024856.10 | -4.3350057 | -8.5336529 | -0.1363584 | 0.04248798 | Cdk2ap2     |
| ENSMUSG00000040282.13 | -4.6178902 | -9.1314707 | -0.1043096 | 0.0445331  | BC052040    |
| ENSMUSG00000066829.6  | -6.001521  | -11.351658 | -0.651384  | 0.02710705 | Zfp810      |
| ENSMUSG00000097971.3  | -0.8669928 | -1.5872286 | -0.1467571 | 0.01793642 | Gm26917     |
| ENSMUSG00000046287.7  | 1.06516695 | 0.31638783 | 1.81394607 | 0.00605166 | Pnma3       |
| ENSMUSG00000104625.1  | -6.6498539 | -11.591145 | -1.7085632 | 0.00882797 | Gm42448     |
| ENSMUSG00000064363.1  | 0.44630236 | 0.09620261 | 0.7964021  | 0.01256485 | mt-Nd4      |
| ENSMUSG00000023883.13 | -2.9065355 | -5.5125145 | -0.2978565 | 0.02816158 | Phf10       |
| ENSMUSG00000031578.5  | -3.0514058 | -5.4996414 | -0.6031701 | 0.0144839  | Mak16       |
| ENSMUSG00000020658.9  | -1.0905567 | -2.1476257 | -0.0334877 | 0.04265834 | Efr3b       |
| ENSMUSG0000001729.14  | -4.0293869 | -7.2131023 | -0.8456716 | 0.01315346 | Akt1        |
| ENSMUSG00000024867.14 | -4.5590336 | -8.9109125 | -0.2071548 | 0.03937883 | Pip5k1b     |
| ENSMUSG00000042109.7  | -1.8113678 | -3.5258344 | -0.0969012 | 0.03765165 | Csd2        |
| ENSMUSG00000046519.15 | -5.4880804 | -10.287399 | -0.6887618 | 0.02429127 | Golph3l     |
| ENSMUSG00000036615.5  | -3.7291135 | -7.4066321 | -0.051595  | 0.04660766 | Rfxap       |
| ENSMUSG0000002150.16  | 2.56573244 | 0.40631636 | 4.72514852 | 0.01940029 | Dab2        |
| ENSMUSG00000033618.6  | -2.961484  | -5.7391756 | -0.1837924 | 0.03586746 | Map3k13     |
| ENSMUSG00000028029.10 | 0.58748933 | 0.09632755 | 1.0786511  | 0.01863879 | Aimp1       |
| ENSMUSG00000032523.10 | 2.25306103 | 0.6708605  | 3.83526156 | 0.00600845 | Hhat1       |
| ENSMUSG00000031870.16 | -6.2423714 | -11.427788 | -1.056955  | 0.01793014 | Pgr         |
| ENSMUSG00000101249.1  | 2.38304981 | 0.51165736 | 4.25444226 | 0.01265152 | Gm29216     |
| ENSMUSG00000038848.14 | -2.7460179 | -5.2468586 | -0.2451773 | 0.03054825 | Ythdf1      |
| ENSMUSG00000037674.15 | -1.9300322 | -3.3721374 | -0.487927  | 0.00915875 | Rfx7        |
| ENSMUSG00000034101.14 | -5.9460562 | -10.673917 | -1.2181955 | 0.01368773 | Ctnnd1      |
| ENSMUSG00000106897.1  | -1.3673483 | -2.5325962 | -0.2021004 | 0.02089208 | Gm43027     |
| ENSMUSG00000074622.4  | -6.0335072 | -10.628474 | -1.4385403 | 0.0103827  | Mafb        |
| ENSMUSG00000037007.17 | -1.0355021 | -1.9905141 | -0.08049   | 0.03274061 | Zfp113      |
| ENSMUSG00000030032.12 | -3.0622015 | -5.5936421 | -0.5307609 | 0.01741203 | Wdr54       |
| ENSMUSG00000024054.13 | -1.4054684 | -2.5544423 | -0.2564945 | 0.01626504 | Smchd1      |
| ENSMUSG00000025821.9  | -4.973866  | -9.8720342 | -0.0756978 | 0.04627608 | Zfp282      |
| ENSMUSG00000021939.7  | -2.4790425 | -4.7395544 | -0.2185305 | 0.03075909 | Ctsb        |
| ENSMUSG00000028644.16 | -4.9114336 | -9.2041444 | -0.6187227 | 0.02421538 | Ermap       |
| ENSMUSG00000050907.14 | 1.02001394 | 0.00450382 | 2.03552406 | 0.0489024  | Pex1        |
| ENSMUSG00000097311.7  | -4.2308753 | -8.4180014 | -0.0437491 | 0.04745163 | Gm26871     |
| ENSMUSG00000094832.1  | -4.5751535 | -8.9374799 | -0.2128272 | 0.03914466 | Gm21846     |
| ENSMUSG00000020484.18 | -3.1429471 | -5.7830296 | -0.5028647 | 0.01917589 | Xbp1        |
| ENSMUSG00000052593.15 | 3.97021454 | 0.15201848 | 7.7884106  | 0.04095058 | Adam17      |
| ENSMUSG00000019948.3  | -5.2658919 | -9.8707179 | -0.6610659 | 0.02428552 | Actr6       |
| ENSMUSG00000087968.1  | -5.4583836 | -10.571642 | -0.3451253 | 0.03562835 | Gm25395     |
| ENSMUSG00000024712.9  | -0.9659617 | -1.8352083 | -0.0967152 | 0.02857852 | Rfk         |
| ENSMUSG00000087437.7  | -4.6453289 | -8.9663747 | -0.3242831 | 0.03429928 | Gm13112     |
| ENSMUSG00000072915.3  | -6.1069553 | -11.131908 | -1.0820023 | 0.01692412 | Gm12258     |
| ENSMUSG00000052605.12 | -5.9661873 | -11.472753 | -0.4596221 | 0.03287508 | Isoc2b      |
| ENSMUSG00000033985.17 | -5.5503377 | -10.072037 | -1.0286386 | 0.01592172 | Tesk2       |
| ENSMUSG00000033499.13 | -0.9922258 | -1.7896112 | -0.1948404 | 0.01463122 | Larp4b      |
| ENSMUSG00000105285.1  | -9.3827915 | -15.389936 | -3.3756474 | 0.00308997 | Gm43238     |
| ENSMUSG00000077450.12 | -0.6845288 | -1.3065466 | -0.062511  | 0.03017201 | Rab11b      |
| ENSMUSG00000024732.7  | -3.9868558 | -7.9084777 | -0.0652339 | 0.04600312 | Ccdc86      |
| ENSMUSG00000064901.1  | -2.0078605 | -3.7700564 | -0.2456647 | 0.0247989  | Snora21     |
| ENSMUSG00000078441.10 | -1.8135457 | -3.4405806 | -0.1865108 | 0.02809732 | NA          |
| ENSMUSG00000029433.14 | -1.7748382 | -3.5359893 | -0.013687  | 0.04809217 | Diablo      |
| ENSMUSG00000071669.14 | -4.7562173 | -9.3516142 | -0.1608203 | 0.04195385 | Snx29       |
| ENSMUSG00000108826.1  | -8.3288097 | -13.19597  | -3.4616492 | 0.0015383  | 493141215R  |
| ENSMUSG00000034042.16 | -1.9492189 | -3.2497438 | -0.648694  | 0.00417997 | Gphpl1      |
| ENSMUSG00000030286.6  | 0.46909518 | 0.01569562 | 0.92249474 | 0.04203364 | Emc3        |
| ENSMUSG00000038593.18 | -2.3923294 | -4.7646398 | -0.0200191 | 0.04793177 | Tctn1       |
| ENSMUSG00000026664.7  | 0.7143112  | 0.18728099 | 1.24134142 | 0.00841955 | Phyh        |
| ENSMUSG00000033378.9  | -4.60175   | -8.959838  | -0.2435162 | 0.03777397 | Grik5       |
| ENSMUSG00000037805.14 | -3.5476724 | -6.1355772 | -0.9597676 | 0.00779887 | Rpl10a      |
| ENSMUSG00000059482.15 | -2.8032464 | -5.3403454 | -0.2661473 | 0.02950958 | 2610301820l |
| ENSMUSG0000002115.14  | -4.2643668 | -7.6767879 | -0.8519458 | 0.01424715 | Vrk1        |

|                       |            |            |            |            |             |
|-----------------------|------------|------------|------------|------------|-------------|
| ENSMUSG00000033047.4  | -2.4523186 | -4.5972101 | -0.3074271 | 0.02431362 | Elf3l       |
| ENSMUSG00000107750.1  | -8.6073014 | -14.627203 | -2.5873994 | 0.00584058 | Gm44013     |
| ENSMUSG00000093989.1  | -0.9503842 | -1.7034788 | -0.1972895 | 0.01339588 | Rnasek      |
| ENSMUSG00000053536.6  | -2.4998836 | -4.4714286 | -0.5283387 | 0.01299934 | Cstf2t      |
| ENSMUSG00000045455.7  | -5.0523013 | -10.008459 | -0.0961437 | 0.04536987 | Gm9797      |
| ENSMUSG00000032589.14 | -0.7668907 | -1.3737049 | -0.1600766 | 0.01327407 | Bsn         |
| ENSMUSG00000046192.4  | -5.8640311 | -10.913638 | -0.8144243 | 0.0222108  | Iqub        |
| ENSMUSG00000040896.16 | -2.2620018 | -4.2595525 | -0.2644512 | 0.02569205 | Kcnd3       |
| ENSMUSG00000066677.11 | -6.7510114 | -12.507685 | -0.994338  | 0.0209671  | Ifi208      |
| ENSMUSG00000051343.11 | -2.1669958 | -4.2635397 | -0.070452  | 0.04224818 | Rab11fip5   |
| ENSMUSG00000041168.9  | -0.5898125 | -1.0172026 | -0.1624225 | 0.00745453 | Lonp1       |
| ENSMUSG00000002297.15 | -5.250747  | -10.256942 | -0.2445524 | 0.03913238 | Dbf4        |
| ENSMUSG00000109781.1  | 5.02205624 | 0.47032622 | 9.57378627 | 0.02974446 | Gm45509     |
| ENSMUSG00000074811.2  | -4.4739229 | -7.7017594 | -1.2460863 | 0.00723731 | Hps6        |
| ENSMUSG00000048285.8  | 2.10145905 | 0.04434814 | 4.15856997 | 0.0448811  | Frmf6       |
| ENSMUSG00000018567.14 | -0.7082602 | -1.3729626 | -0.0435578 | 0.03598275 | Gabarap     |
| ENSMUSG00000081342.1  | -9.2494103 | -14.777539 | -3.7212819 | 0.00183349 | Gm11434     |
| ENSMUSG00000026728.9  | -2.1582653 | -4.1094914 | -0.2070392 | 0.0293309  | Vim         |
| ENSMUSG00000056665.2  | 4.5284257  | -7.7578859 | -1.2989655 | 0.00668448 | Them6       |
| ENSMUSG00000039115.13 | 5.0302827  | -9.5731016 | -0.4874638 | 0.02915449 | Itaga9      |
| ENSMUSG00000079157.4  | -2.8852505 | -5.5669846 | -0.2135164 | 0.0334684  | Fam155a     |
| ENSMUSG00000043843.16 | -5.2612592 | -9.9931446 | -0.5293738 | 0.02849071 | Tmem145     |
| ENSMUSG00000106841.1  | -5.4882369 | -10.791568 | -0.1849056 | 0.04198125 | Gm42656     |
| ENSMUSG00000050229.3  | -7.8064892 | -13.362405 | -2.2505734 | 0.00659162 | Pigm        |
| ENSMUSG00000102690.1  | -7.8138651 | -14.170098 | -1.4576321 | 0.01577591 | Gm37779     |
| ENSMUSG00000106101.1  | 5.97285188 | 0.69400237 | 11.2517014 | 0.02581136 | Gm43438     |
| ENSMUSG00000083253.1  | -2.2453733 | -4.1989807 | -0.2917659 | 0.02358747 | Gm7108      |
| ENSMUSG00000038594.8  | -5.414722  | -10.537577 | -0.2918667 | 0.03756582 | Cep85l      |
| ENSMUSG00000032567.14 | -7.6245094 | -13.687189 | -1.5618302 | 0.0136911  | Aste1       |
| ENSMUSG00000024260.13 | -4.3725586 | -8.1003273 | -0.64479   | 0.02094162 | Sap130      |
| ENSMUSG00000097189.1  | 5.69582408 | 0.05949254 | 11.3321556 | 0.04742627 | Gm26594     |
| ENSMUSG00000027552.14 | 5.38953343 | 0.43741244 | 10.3416544 | 0.03207993 | E2f5        |
| ENSMUSG00000031728.10 | 1.19631671 | 0.00844357 | 2.38418985 | 0.04825223 | Zfp821      |
| ENSMUSG00000081046.1  | -6.0027511 | -10.918247 | -1.0872548 | 0.01643315 | Gm12846     |
| ENSMUSG00000036285.10 | -2.3817072 | -4.3420976 | -0.4213169 | 0.01695909 | Noa1        |
| ENSMUSG00000035764.5  | -2.1529757 | -4.2872448 | -0.187066  | 0.04785352 | Fbxo45      |
| ENSMUSG00000048833.8  | -5.4512725 | -10.405164 | -0.4973809 | 0.03018647 | Slc39a9     |
| ENSMUSG00000020935.8  | -5.3595168 | -10.311139 | -0.4078944 | 0.03305642 | Dcald       |
| ENSMUSG00000033720.12 | 0.83608878 | 0.00792229 | 1.66425527 | 0.04766186 | Sfxn5       |
| ENSMUSG00000086040.8  | -2.1553679 | -4.222657  | -0.0880788 | 0.04038012 | Wipf3       |
| ENSMUSG00000087598.9  | -2.1196326 | -4.1994593 | -0.039806  | 0.045429   | Zfp111      |
| ENSMUSG00000036398.13 | -0.7716543 | -1.5055324 | -0.0377762 | 0.03861928 | Ppp1r11     |
| ENSMUSG00000025894.11 | -5.4103592 | -8.6172508 | -2.2034676 | 0.00171894 | Aasdhppt    |
| ENSMUSG00000046324.12 | -5.7428111 | -11.11035  | -0.3752718 | 0.03519715 | Ermp1       |
| ENSMUSG00000022802.2  | -2.0130725 | -3.7453707 | -0.2807743 | 0.02212179 | Lmln        |
| ENSMUSG00000022350.6  | -6.4981049 | -11.493718 | -1.5024918 | 0.01103825 | Washc5      |
| ENSMUSG00000024451.8  | -5.4339544 | -10.790623 | -0.0772862 | 0.04651474 | Arap3       |
| ENSMUSG00000025348.8  | -7.0129073 | -12.400653 | -1.6251613 | 0.0109901  | Itaga7      |
| ENSMUSG00000019774.8  | -5.0293971 | -8.8052128 | -1.2535814 | 0.00945114 | Mtrf11      |
| ENSMUSG00000048814.10 | -4.6470335 | -8.2934792 | -1.0005879 | 0.01258906 | Lonrf2      |
| ENSMUSG00000008305.18 | -4.4497612 | -8.1343521 | -0.7651703 | 0.01758786 | Tle1        |
| ENSMUSG00000037013.15 | 7.37680661 | 1.16047757 | 13.5931357 | 0.0195451  | Ss18        |
| ENSMUSG00000026385.16 | 0.63492837 | 0.00963329 | 1.26022344 | 0.04628729 | Dbi         |
| ENSMUSG00000003269.16 | -2.6187021 | -5.0338439 | -0.2035604 | 0.03274005 | Cyth2       |
| ENSMUSG00000071359.13 | -5.2747048 | -10.430661 | -0.1187484 | 0.04455072 | Tbpl1       |
| ENSMUSG00000026433.13 | -6.0385556 | -11.370577 | -0.7065341 | 0.02567652 | Rab29       |
| ENSMUSG00000002307.15 | -2.9966452 | -5.8130608 | -0.1802296 | 0.03626221 | Daxx        |
| ENSMUSG00000079083.2  | 1.33390451 | 0.00718127 | 2.66062775 | 0.0486636  | Jrk         |
| ENSMUSG00000021189.11 | -2.4862034 | -4.9391703 | -0.0332365 | 0.04672    | Atbn3       |
| ENSMUSG00000026077.15 | -3.7703151 | -6.56933   | -0.9713001 | 0.00877387 | Npas2       |
| ENSMUSG00000039801.6  | -0.8943603 | -1.7101155 | -0.0786052 | 0.03080783 | 2410089E03f |
| ENSMUSG00000024395.7  | -6.1283511 | -11.553765 | -0.7029376 | 0.02606033 | Lims2       |
| ENSMUSG00000034055.16 | -7.9209372 | -14.25468  | -1.5871943 | 0.01418073 | Phka1       |
| ENSMUSG00000029787.10 | -5.3999394 | -10.357219 | -0.4426594 | 0.03192411 | Avl9        |
| ENSMUSG00000038002.8  | -7.2692248 | -13.232624 | -1.3058255 | 0.01661698 | Cramp1l     |
| ENSMUSG00000036902.10 | -5.4301033 | -10.129852 | -0.730354  | 0.02287872 | Neto2       |
| ENSMUSG00000034675.17 | -0.5871191 | -1.1417705 | -0.0324678 | 0.03727142 | Dbn1        |
| ENSMUSG00000041439.15 | -1.3042191 | -2.4569748 | -0.1514634 | 0.02582126 | Mfsd6       |
| ENSMUSG00000022132.15 | -6.5855795 | -11.315064 | -1.856095  | 0.00701292 | Cldn10      |
| ENSMUSG00000088185.1  | -7.4600894 | -13.421664 | -1.4985149 | 0.01412625 | Scarna2     |
| ENSMUSG00000016262.14 | -6.4632653 | -12.703873 | -0.222658  | 0.04181019 | Sertad4     |
| ENSMUSG00000039840.7  | -5.7821396 | -11.17656  | -0.3877196 | 0.03485169 | Epg5        |
| ENSMUSG00000030084.11 | -3.465299  | -6.3689325 | -0.5616654 | 0.0188923  | Plxn1       |
| ENSMUSG00000003429.11 | -0.4734104 | -0.9287102 | -0.0181107 | 0.04095814 | Rps11       |
| ENSMUSG00000106032.1  | 5.03489845 | 0.2923335  | 9.77746341 | 0.036694   | Gm42463     |
| ENSMUSG00000024424.14 | -2.365177  | -4.4479827 | -0.2823713 | 0.02528295 | Ttc3c       |
| ENSMUSG00000020086.6  | -3.7684037 | -7.4022174 | -0.13459   | 0.04152569 | H2afy2      |
| ENSMUSG00000085196.1  | -2.3052631 | -4.1774093 | -0.4331169 | 0.01561651 | Gm14963     |
| ENSMUSG00000024404.6  | -2.4177073 | -4.7805545 | -0.0548601 | 0.04450906 | Riok3       |
| ENSMUSG00000083378.3  | -1.3754871 | -2.4940922 | -0.256882  | 0.01575047 | Gm13196     |
| ENSMUSG00000045672.15 | -5.9807237 | -11.71897  | -0.2424771 | 0.04045113 | Col27a1     |
| ENSMUSG00000020900.15 | 0.49908374 | 0.11845752 | 0.87970996 | 0.0104787  | Myh10       |
| ENSMUSG00000015305.6  | -0.9995818 | -1.9274772 | -0.0716864 | 0.03391973 | Sash1       |
| ENSMUSG00000047379.6  | -0.6129259 | -1.0891676 | -0.1366842 | 0.01182147 | B4gat1      |
| ENSMUSG00000018849.6  | 0.57439892 | 0.08064771 | 1.06815013 | 0.02198243 | Wwc1        |
| ENSMUSG00000074505.4  | -1.1200651 | -2.0486158 | -0.1915143 | 0.0171353  | Fat3        |
| ENSMUSG00000020705.6  | -0.5830574 | -1.1219769 | -0.044138  | 0.0331356  | Ddx42       |
| ENSMUSG00000066952.11 | -4.8679459 | -9.0664924 | -0.6693994 | 0.02241859 | Myo1h       |
| ENSMUSG00000025128.7  | -2.704584  | -5.2309545 | -0.1782134 | 0.03508636 | Bhlhe22     |
| ENSMUSG00000051238.5  | -5.8898199 | -11.059681 | -0.7199592 | 0.02481733 | Swsap1      |
| ENSMUSG00000016349.10 | -0.9991248 | -1.5551316 | -0.443118  | 0.00104227 | Eef1a2      |
| ENSMUSG00000020420.8  | -7.6603294 | -14.275359 | -1.0452995 | 0.02257919 | Zfp607a     |
| ENSMUSG00000096956.2  | 4.60757413 | 0.36643487 | 8.84871339 | 0.03239307 | Snhg18      |
| ENSMUSG00000026792.16 | -5.6663714 | -10.415207 | -0.9175356 | 0.01891347 | Lrsam1      |
| ENSMUSG00000031529.5  | -1.4067623 | -2.5788114 | -0.2347132 | 0.0182551  | Tnks        |
| ENSMUSG00000005370.3  | -5.4207668 | -10.499285 | -0.3422489 | 0.03564713 | Msh6        |
| ENSMUSG00000042831.13 | -5.8420278 | -11.144495 | -0.5395608 | 0.02998112 | Alkbh6      |
| ENSMUSG00000029777.10 | 0.42530487 | 0.02366294 | 0.8269468  | 0.03720057 | Gars        |
| ENSMUSG00000041703.7  | -1.6859767 | -3.3592137 | -0.0127397 | 0.04813019 | Zic5        |
| ENSMUSG00000024944.5  | -1.1681505 | -2.2458869 | -0.090414  | 0.03280485 | Arf2        |
| ENSMUSG00000091264.2  | 1.17139426 | 0.07390677 | 2.26888174 | 0.03565605 | Snim13      |
| ENSMUSG00000078630.8  | 6.93993914 | 0.69147278 | 13.1884055 | 0.02866513 | Tomt        |
| ENSMUSG00000028049.15 | 6.85039222 | 1.99669917 | 11.7039793 | 0.00639112 | Scamp3      |
| ENSMUSG00000063767.4  | -5.8899655 | -10.471188 | -1.3087429 | 0.01190018 | S100a7a     |
| ENSMUSG00000014980.14 | -6.711131  | -11.359452 | -2.0627744 | 0.0054564  | Tsen15      |



|                       |            |            |            |            |             |
|-----------------------|------------|------------|------------|------------|-------------|
| ENSMUSG00000029486.13 | -4.521116  | -8.8999756 | -0.1422564 | 0.04248577 | Mrpl1       |
| ENSMUSG00000069814.6  | -5.8572303 | -11.421988 | -0.2924729 | 0.03840945 | Ccdc92b     |
| ENSMUSG00000019851.7  | -6.1972406 | -11.703995 | -0.690486  | 0.02661453 | Perp        |
| ENSMUSG00000071723.7  | -0.9555511 | -1.6883687 | -0.2227335 | 0.01086495 | Gspt2       |
| ENSMUSG00000038822.15 | -5.6706134 | -11.028448 | -0.312779  | 0.03730133 | Hace1       |
| ENSMUSG00000012609.18 | 0.68763274 | 0.07049612 | 1.30476936 | 0.02815421 | Ttlf5       |
| ENSMUSG00000036435.13 | -3.9961746 | -7.7663917 | -0.2259576 | 0.03701075 | Exoc1       |
| ENSMUSG00000044067.6  | -6.9341847 | -12.100222 | -1.7681477 | 0.00898264 | Gpr22       |
| ENSMUSG00000035834.11 | -6.8986297 | -12.925769 | -0.8714909 | 0.02415918 | Polr3g      |
| ENSMUSG00000023345.15 | 3.96432096 | 0.11372406 | 7.81491787 | 0.04312034 | Pocla       |
| ENSMUSG00000022829.14 | -6.0636584 | -11.811947 | -0.3153699 | 0.0379667  | Stxbp5l     |
| ENSMUSG00000023186.14 | 5.50097791 | 0.95869151 | 10.0432643 | 0.01729071 | Vwa5a       |
| ENSMUSG00000031835.16 | 0.65711193 | 0.02976633 | 1.28445754 | 0.03940917 | Mbtps1      |
| ENSMUSG00000008035.12 | -2.7041438 | -4.3582449 | -1.0500427 | 0.00219162 | Mid1p1      |
| ENSMUSG00000090624.1  | -6.64375   | -12.64664  | -0.6408602 | 0.02923477 | Gm17060     |
| ENSMUSG00000029797.13 | -8.6823508 | -16.306246 | -1.0584553 | 0.02487079 | Sspo        |
| ENSMUSG00000015488.14 | 1.14344004 | 0.5132572  | 1.77362288 | 0.0009637  | Cacfd1      |
| ENSMUSG00000032199.12 | -1.4795773 | -2.6552391 | -0.3039154 | 0.01363014 | Polr2m      |
| ENSMUSG00000021591.7  | 5.28784282 | 0.47362597 | 10.1020597 | 0.03049554 | Glrx        |
| ENSMUSG00000027184.14 | -1.0711282 | -2.1220103 | -0.0202462 | 0.04540012 | Caprin1     |
| ENSMUSG00000028926.15 | -0.4738608 | -0.8997019 | -0.0480196 | 0.02836313 | Cdk14       |
| ENSMUSG00000025486.17 | -5.8814198 | -11.066663 | -0.6961764 | 0.02545062 | Sirt3       |
| ENSMUSG00000058267.13 | -4.201339  | -7.9540468 | -0.4486313 | 0.02740962 | Mrps14      |
| ENSMUSG00000097482.2  | 6.0055582  | 0.22895971 | 11.7821567 | 0.04098732 | Gm17634     |
| ENSMUSG00000022528.7  | 6.25460331 | 1.31909825 | 11.1901084 | 0.01304587 | Hes1        |
| ENSMUSG00000054855.13 | -6.3794486 | -11.91072  | -0.8481771 | 0.02311747 | Rnd1        |
| ENSMUSG00000022865.13 | 7.50018923 | 1.382872   | 13.6175065 | 0.01603643 | Cxadr       |
| ENSMUSG00000033676.13 | -4.6124882 | -8.5426611 | -0.6823152 | 0.02087425 | Gabbr3      |
| ENSMUSG00000035133.8  | 1.08354766 | 0.50101229 | 1.66608304 | 0.00078693 | Arhgap5     |
| ENSMUSG00000055720.9  | -8.6165132 | -15.385124 | -1.8479025 | 0.01267679 | Ubl7        |
| ENSMUSG00000079069.1  | -5.8828277 | -11.050177 | -0.7154788 | 0.02491751 | 8430423G03  |
| ENSMUSG00000020261.15 | 6.51927568 | 0.32227855 | 12.7162728 | 0.03851632 | Slc36a1     |
| ENSMUSG00000025058.4  | -2.0180548 | -3.9038648 | -0.1322448 | 0.03515974 | 5430427019  |
| ENSMUSG00000024030.6  | -1.201445  | -2.2126547 | -0.1902353 | 0.01940359 | Abcg1       |
| ENSMUSG00000093858.1  | -6.5244294 | -12.890376 | -0.1584831 | 0.04413599 | Gm19967     |
| ENSMUSG00000096950.2  | 3.43681563 | 1.3827654  | 5.49086586 | 0.00183318 | Gm9530      |
| ENSMUSG00000106734.3  | -6.9768768 | -13.584205 | -0.3695485 | 0.0377635  | Gm20559     |
| ENSMUSG0000002523.9   | -6.2227242 | -11.590711 | -0.8547373 | 0.02244201 | Fgf12       |
| ENSMUSG00000021867.16 | -8.2416765 | -14.651163 | -1.8321904 | 0.01188946 | Tmem254b    |
| ENSMUSG00000072676.11 | -8.2416765 | -14.651163 | -1.8321904 | 0.01188946 | Tmem254a    |
| ENSMUSG00000003458.12 | 5.23192178 | 0.20030843 | 10.2635351 | 0.04095145 | Ncstn       |
| ENSMUSG00000004698.10 | 1.50355772 | 0.3528026  | 2.65431283 | 0.01072302 | Hdac9       |
| ENSMUSG00000087574.1  | -4.3310966 | -8.2826218 | -0.3795714 | 0.03085473 | C030037D09I |
| ENSMUSG00000095440.1  | -6.6622377 | -12.848948 | -0.4755279 | 0.03987174 | Flgnt2      |
| ENSMUSG00000053929.16 | 0.52666505 | 0.05494264 | 0.99838745 | 0.02783793 | Cyhr1       |
| ENSMUSG00000085492.7  | -6.2077007 | -11.714526 | -0.7008754 | 0.02636286 | Trmt61b     |
| ENSMUSG00000032932.14 | -2.168006  | -4.2610133 | -0.0749987 | 0.04177784 | Hspa13      |
| ENSMUSG00000090048.1  | 7.1413239  | 0.8063706  | 13.4762772 | 0.02636084 | Rumx2os3    |
| ENSMUSG00000025738.7  | -1.43442   | -2.4150841 | -0.4537559 | 0.00497668 | Fbxl16      |
| ENSMUSG00000064127.13 | -1.9152043 | -3.4469759 | -0.3834328 | 0.01420017 | Med14       |
| ENSMUSG00000031955.10 | -5.1829788 | -9.6581882 | -0.7077694 | 0.0225639  | Bcar1       |
| ENSMUSG00000006675.10 | -0.960669  | -1.8916749 | -0.029663  | 0.04261949 | P4htm       |
| ENSMUSG00000091475.2  | -7.0904402 | -14.034972 | -1.145908  | 0.04500463 | 2810468N07  |
| ENSMUSG00000018821.3  | 1.14788654 | 0.18456454 | 2.11120855 | 0.01906829 | Avp1        |
| ENSMUSG00000078117.2  | -8.902689  | -16.410142 | -1.3952364 | 0.01962741 | Gm16485     |
| ENSMUSG00000027079.15 | -7.0115151 | -13.98897  | -0.0340605 | 0.04879322 | Cip1        |
| ENSMUSG00000096370.8  | 4.7326429  | 0.37494864 | 9.09033715 | 0.03245142 | Gm21992     |
| ENSMUSG00000025318.13 | -0.8292547 | -1.5414852 | -0.1170242 | 0.02187532 | Jph3        |
| ENSMUSG00000021238.10 | -7.5039021 | -13.712087 | -1.2957176 | 0.01749589 | Aldh6a1     |
| ENSMUSG00000066158.7  | 8.20701539 | 2.05097869 | 14.3630521 | 0.00936682 | AY512931    |
| ENSMUSG00000044505.5  | -6.4960526 | -12.964944 | -0.0271609 | 0.04896029 | Lingp4      |
| ENSMUSG00000087543.1  | -9.3904356 | -16.16517  | -2.6157008 | 0.00723544 | Gm16576     |
| ENSMUSG00000030583.16 | -4.3616778 | -8.3173055 | -0.4060501 | 0.02984624 | Sipa113     |
| ENSMUSG00000054693.14 | -4.339326  | -8.3766654 | -0.3019866 | 0.0343423  | Adam10      |
| ENSMUSG00000015837.15 | -0.5428963 | -1.0043057 | -0.0814869 | 0.02056189 | Sqstm1      |
| ENSMUSG00000070544.6  | 0.59408429 | 0.0167265  | 1.17144207 | 0.04324246 | Top1        |
| ENSMUSG00000085326.1  | -4.0763953 | -8.1126888 | -0.0401018 | 0.04757378 | Gm15642     |
| ENSMUSG00000108402.1  | -1.1328107 | -1.9707879 | -0.2948335 | 0.00856699 | 9430064I24R |
| ENSMUSG00000089682.9  | 6.86304381 | 0.84281747 | 12.8832702 | 0.02472536 | Bcl2l2      |
| ENSMUSG00000030534.13 | -2.0421668 | -3.8693498 | -0.2149837 | 0.027672   | Vps33b      |
| ENSMUSG00000029063.16 | -6.9288085 | -13.697366 | -0.1602512 | 0.04440669 | Nadk        |
| ENSMUSG00000022160.17 | 4.8416586  | 0.00085354 | 9.68246366 | 0.04995591 | Mettl3      |
| ENSMUSG00000107091.1  | -9.2109899 | -17.176219 | -1.2457606 | 0.0227641  | Gm43343     |
| ENSMUSG00000052609.8  | 0.71872368 | 0.00586889 | 1.43157846 | 0.04798118 | Plekhg3     |
| ENSMUSG00000030539.13 | -2.5319559 | -4.9848396 | -0.0790722 | 0.04253928 | Sema4b      |
| ENSMUSG00000025903.14 | 1.48439594 | 0.04488726 | 2.92390462 | 0.04276502 | Lyp1a1      |
| ENSMUSG00000027878.11 | -1.112008  | -2.0108759 | -0.2131402 | 0.01517094 | Notch2      |
| ENSMUSG00000034235.16 | -3.9963141 | -7.9873486 | -0.0052796 | 0.04967013 | Usp54       |
| ENSMUSG00000024798.15 | -7.2554215 | -13.40914  | -1.1017026 | 0.02031235 | Htr7        |
| ENSMUSG00000056260.15 | 4.95907319 | 0.6857664  | 9.23237999 | 0.02230137 | Lrfl1       |
| ENSMUSG00000038415.9  | 5.3223856  | 0.31384877 | 10.3309224 | 0.0365057  | Foxq1       |
| ENSMUSG00000050121.8  | -7.033153  | -13.223637 | -0.8426693 | 0.02521287 | Opalin      |
| ENSMUSG00000092837.1  | -3.9120553 | -7.4920399 | -0.3320706 | 0.03137197 | Rpph1       |
| ENSMUSG00000024851.13 | -0.3966432 | -0.7409467 | -0.0523397 | 0.02327241 | Pitpnm1     |
| ENSMUSG00000067219.9  | -1.4831792 | -2.7166314 | -0.2497269 | 0.01805408 | Nipal1      |
| ENSMUSG00000053931.11 | 0.73229529 | 0.05823661 | 1.40635396 | 0.03239359 | Cnn3        |
| ENSMUSG00000102266.1  | -1.3478402 | -2.6561197 | -0.0395607 | 0.04296809 | Gm38106     |
| ENSMUSG00000051149.15 | -1.4480774 | -2.8772255 | -0.0189292 | 0.04679133 | Adnp        |
| ENSMUSG00000015133.17 | -8.2826669 | -16.265962 | -0.299372  | 0.04142951 | Lrrk1       |
| ENSMUSG00000034403.16 | -1.1153311 | -2.164743  | -0.0659193 | 0.03647766 | Pja1        |
| ENSMUSG00000032127.8  | -2.3609675 | -4.5561841 | -0.1657508 | 0.03422025 | Vps11       |
| ENSMUSG00000032905.4  | -1.230565  | -2.3264147 | -0.1347153 | 0.02694613 | Atg12       |
| ENSMUSG00000087502.1  | -1.7866367 | -3.474873  | -0.0984004 | 0.03731859 | Gm16091     |
| ENSMUSG00000042428.6  | -1.1276621 | -2.211204  | -0.0441201 | 0.04076495 | Mgat3       |
| ENSMUSG00000046607.6  | 1.1658717  | 0.2011424  | 2.130601   | 0.01751479 | Hrk         |
| ENSMUSG00000011096.17 | -1.2279876 | -2.4197439 | -0.0362313 | 0.04293297 | Akt1s1      |
| ENSMUSG00000086844.1  | -6.865018  | -13.610763 | -0.119273  | 0.04576232 | B230206H07  |
| ENSMUSG00000022676.6  | 3.64383738 | 0.16371532 | 7.12395943 | 0.03948951 | Snai2       |
| ENSMUSG00000039137.18 | -6.4333489 | -12.468969 | -0.3977284 | 0.03591632 | Whrn        |
| ENSMUSG00000030649.18 | -8.7104152 | -16.76453  | -0.6563003 | 0.03320487 | Anapc15     |
